# Supplementary material for: Control of Viral Infection by Natural Killer Cell Inhibitory Receptors
Source: PubMed Central journal article supplement — Cell Rep. Author manuscript; Available in PMC 2021 Jul 28. (PMC7458139; doi:10.1016/j.celrep.2020.107969), 2020-07-28
Supplement: NIHMS1617667-supplement-1.pdf [file NIHMS1617667-supplement-1.pdf]

**Cell Reports, Volume 32**

## **Supplemental Information**

### **Control of Viral Infection**

#### **by Natural Killer Cell Inhibitory Receptors**

**Bijal A. Parikh, Michael D. Bern, Sytse J. Piersma, Liping Yang, Diana L. Beckman, Jennifer Poursine-Laurent, Béatrice Plougastel-Douglas, and Wayne M. Yokoyama**

## Supplementary Figure Legends

Figure S1. Characterization of on-target and off-target CRISPR deletions targeting specific *Ly49* genes.

Genomic DNA was isolated from back-crossed H2D<sup>d</sup> CRISPR-Cas9 modified mice used in these studies.

The specific CRISPR-targeted exons (those with homology to the ITIM) were Sanger sequenced as representative of the most likely position of off-target effects and to confirm and characterize the

frameshift in on-target variants. The primers used for PCR and subsequent sequence analysis are shown

in **Table S4**. (A-P) Each panel depicts the reference sequence (above), the region of the exon targeted (in

blue), the on-target and off-target guide sites (in purple), and the Sanger alignments (below) for the

mice indicated. Mice are designated as to which strains (in parentheses) were analyzed. B6 is the wild-

type genome for comparison. Red boxes indicate indels (inserted nucleotides are shown, while deleted

bases are represented as a dash). Sequence analysis was confirmed in both the forward and reverse

directions, however, for clarity only one direction is shown. Sequences assessed in each panel are as

follows: (A) *Klra1/Ly49a*, (B) *Klra2/Ly49b*, (C) *Klra3/Ly49c*, (D) *Klra4/Ly49d*, (E) *Klra5/Ly49e*, (F)

*Klra6/Ly49f*, (G) *Klra7/Ly49g*, (H) *Klra8/Ly49h*, (I) *Klra9/Ly49i*, (J) *Klra10/Ly49j*, (K) *Klra11-ps/Ly49k*, (L)

*Klra13-ps/Ly49m*, (M) *Klra14/Ly49n*, (N) *Klra17/Ly49q*, (O) *Gm6548*, and (P) *Gm15854/Ly49x*. (Q)

Nucleotide level analysis of the  $\Delta$ Ly49-1 deletions for the haplotype corresponding to **Figure 2A** at the

*Ly49g-Ly49a* and *Ly49n-Ly49k* junctions. Related to **Figure 2A**.

Figure S2. Flow cytometric characterization of CRISPR-Cas9 modified mice.

Offset flow histograms are shown for mice on the D8-KODO (H2D<sup>d</sup>) MHC background with the indicated

CRISPR-Cas9 modifications. Single-cell suspensions of mouse splenocytes were gated for expression of specific proteins with loci near or in the NKC. (A-O) Shown is a representative plot of

NK1.1<sup>+</sup>/NKp46<sup>+</sup>/CD19<sup>-</sup>/CD3<sup>-</sup> lymphocytes. Protein levels assessed in each panel are as follows: (A) Ly49A,

(B) Ly49C, (C) Ly49D, (D) Ly49EF, (E) Ly49F, (F) Ly49G, (G) Ly49H, (H) Ly49I, (I) CDD94, (J) NKG2A, (K)

NKG2D, (L) CD69, (M) CD122, (N) CD127 and (O) 2B4. The flow cytometric analyses were repeated twice with 3 mice per group. Below the plots, quantification of the flow data as frequencies (A-J) or MFI (K-O) from one of two representative experiments is provided. (P) Representative maturation plots are shown for all experimental mice with the summation of a representative experiment provided at the bottom. No significant deviations were noted. Analyses were repeated twice with 3 mice per group. (Q) Quantification of NK cell frequencies gated as CD3<sup>+</sup>CD19<sup>-</sup>NK1.1<sup>+</sup> lymphocytes. (R) Flow cytometric analysis of mice heterozygous for the  $\Delta$ Ly49-1 D8-KODO KO (F<sub>1</sub> hybrids of KODO mice with intact *Ly49s* and  $\Delta$ Ly49-1 D8-KODO mice from **Fig2B**) compared with KO and WT mice. Experiments were performed twice with 5-7 mice per group, with the exception that WT mice were assessed only once in this panel with values consistent with panels above. (S) Flow cytometry gating strategy. For all flow cytometry data, statistical analyses was performed using one-way ANOVA and corrected for multiple comparison using the Bonferroni method with D8-KODO expression or MFI as a comparator; \*\*\*\* $p < .0001$ , \*\*\* $p < .001$ , \*\* $p < .01$ , \* $p < .05$ . Related to **Figures 2 and 4**.

Figure S3. Strategy and characterization of the NKp46-Ly49A knockin.

(A) CRISPR knockin strategy for Ly49A expression on NKp46-expressing cells. 2 CRISPR guides, T1 and T3 (**Table S1**) were injected into B6 zygotes along with Cas9 mRNA and a donor DNA construct engineered to express the *Ly49A* cDNA following a P2A cleavage site such that the Ly49A expression would be proportional to NKp46 (*Ncr1*) transcript levels. (B) The final NKp46 TGA stop codon and several downstream bases (yellow highlighted region) in the coding region of exon 7 (blue text) were removed and replaced with a P2A site (purple text), *Ly49A* cDNA (red text) and finally the remainder of the NKp46 3' UTR sequence (green text). This donor vector with NKp46 homologous arms was co-injected with sgRNA for *Ncr1* and Cas9 into B6 zygotes and positive knockin mice were selected at birth by PCR analysis and confirmed at 6 weeks of age by flow cytometry. (C) One *Ly49A* KI line was crossed to the

$\Delta$ Ly49-1 D8-KODO mice (**Figure 2A**) heterozygous for one knockin allele and confirmed by flow cytometry. Lymphocytes for splenic single cell suspensions were assessed for both NK1.1 and Ly49A expression. Approximately 18% of NK cells from WT (D8-KODO) mice expressed Ly49A, while the  $\Delta$ Ly49-1 D8-KODO mice lacked all Ly49A expression unless expressing the Ly49A from the knockin construct (nearly 100% expression). As shown, Ly49A expression was restricted to NK1.1<sup>+</sup> splenocytes. Related to **Figures 3F** and **4C**.

Figure S4. *In vivo* cytotoxicity in Ly49AG KO and Ly49AYF mice.

*In vivo* cytotoxicity of MHC-I deficient (KODO) or sufficient (D8-KODO) splenocytes following differential labelling with Celltrace Violet and flow cytometric analysis recovered from spleens at 2 days post-injection. (A) Flow cytometric analysis of input cells is shown (prior to injection). The experimental design is also depicted with the timing of antibody depletion relative to injection and harvest. (B) Representative histogram plots of the mice indicated in each row and treatments by column. The peaks are identified by the input plot shown in (A). (C) Quantification was performed as previously described (**Figure 4C**). Data are representative of two independent experiments with three recipient mice per group that received the same mix of donor cells in each experiment. Standard error of the mean is shown; statistical analysis performed using one-way ANOVA and corrected for multiple comparison using the Bonferroni method; \* $p < .05$ , \*\*\*\* $p < .0001$ . Related to **Figure 4**.

Figure S5. Sanger sequence analysis of *m06* and *m152* in CRISPR-modified MCMV strains.

Viral DNA was isolated from *in vitro* cell cultures infected with CRISPR-Cas9 modified MCMV used in these studies. The specific CRISPR-targeted ORFs, (A) *m06* and (B) *m152*, were Sanger sequenced to confirm and characterize the frameshift in on-target variants. The primers used for PCR and subsequent sequence analysis are shown in **Table S5**. Each panel depicts the reference sequence above with the

region of the ORF expanded for analysis. The Sanger alignments below for the viruses indicated are designated as to which strains (*left* of trace) were analyzed. Δm157-MCMV is the wild-type genome at these ORFs, for comparison. Red boxes indicate where inserted nucleotides were identified. Sequence analysis was confirmed in both the forward and reverse direction, however, only one direction is shown for clarity. Related to **Figure 5**.

Figure S6. Multi-step growth curve

Multi-step *in vitro* growth kinetics of two strains of MCMV, as indicated. Cells and supernatants were harvested at the indicated days and quantified by real-time PCR. Data is a representative of two independent experiments with each data point performed in triplicate. All timepoints were shown to significantly different in terms of viral load ( $p < .0001$ ); statistical analysis performed with a Student's *t*-Test. Related to **Figure 5**.

A.

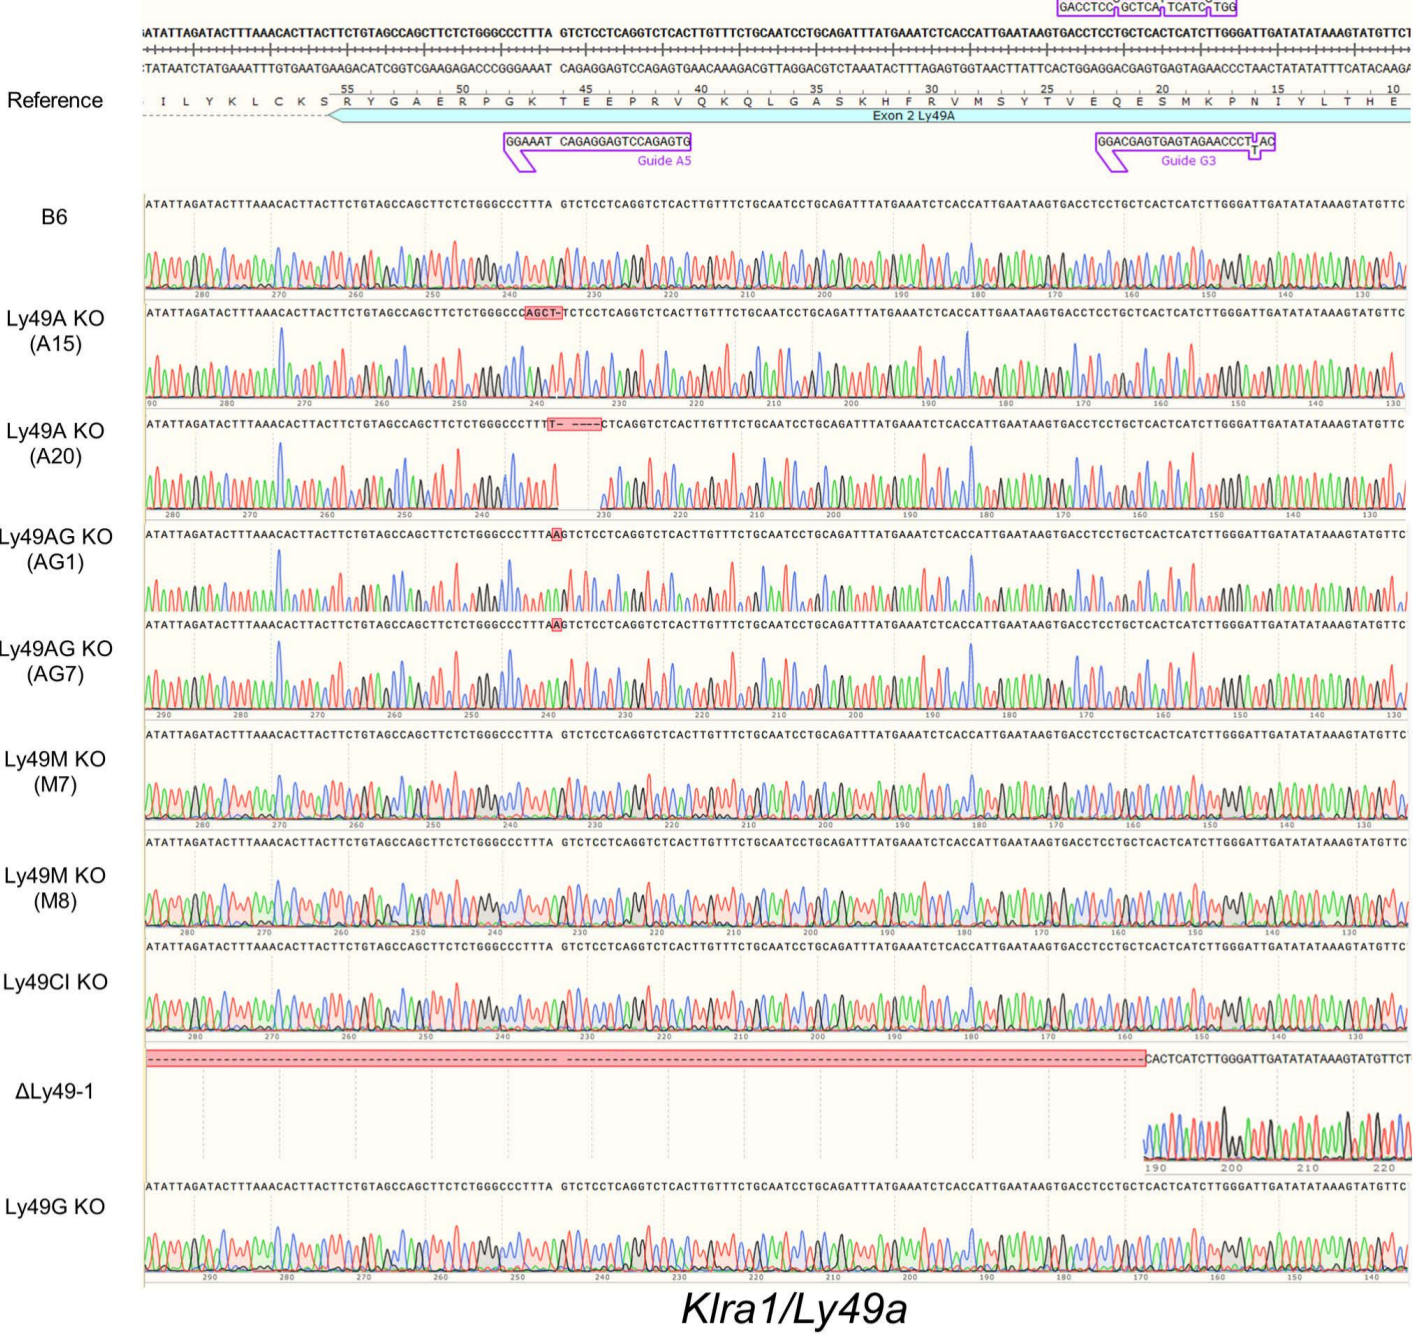

B.

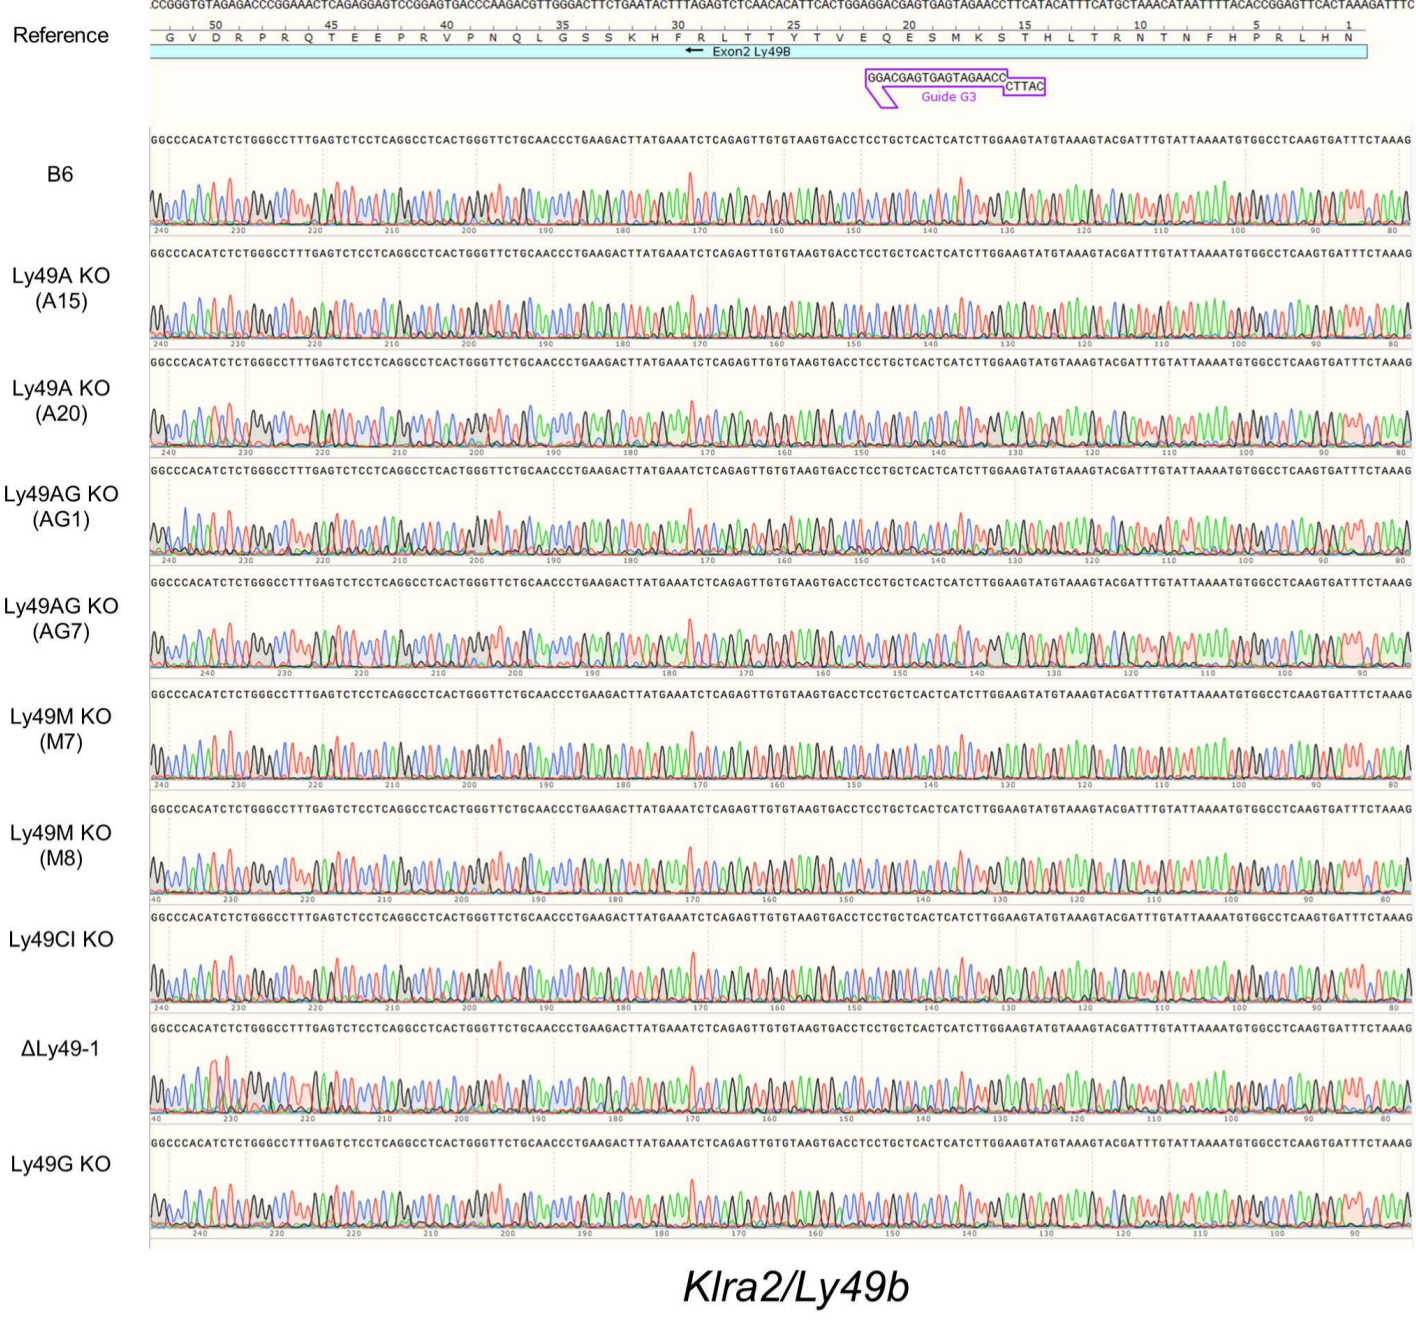

C.

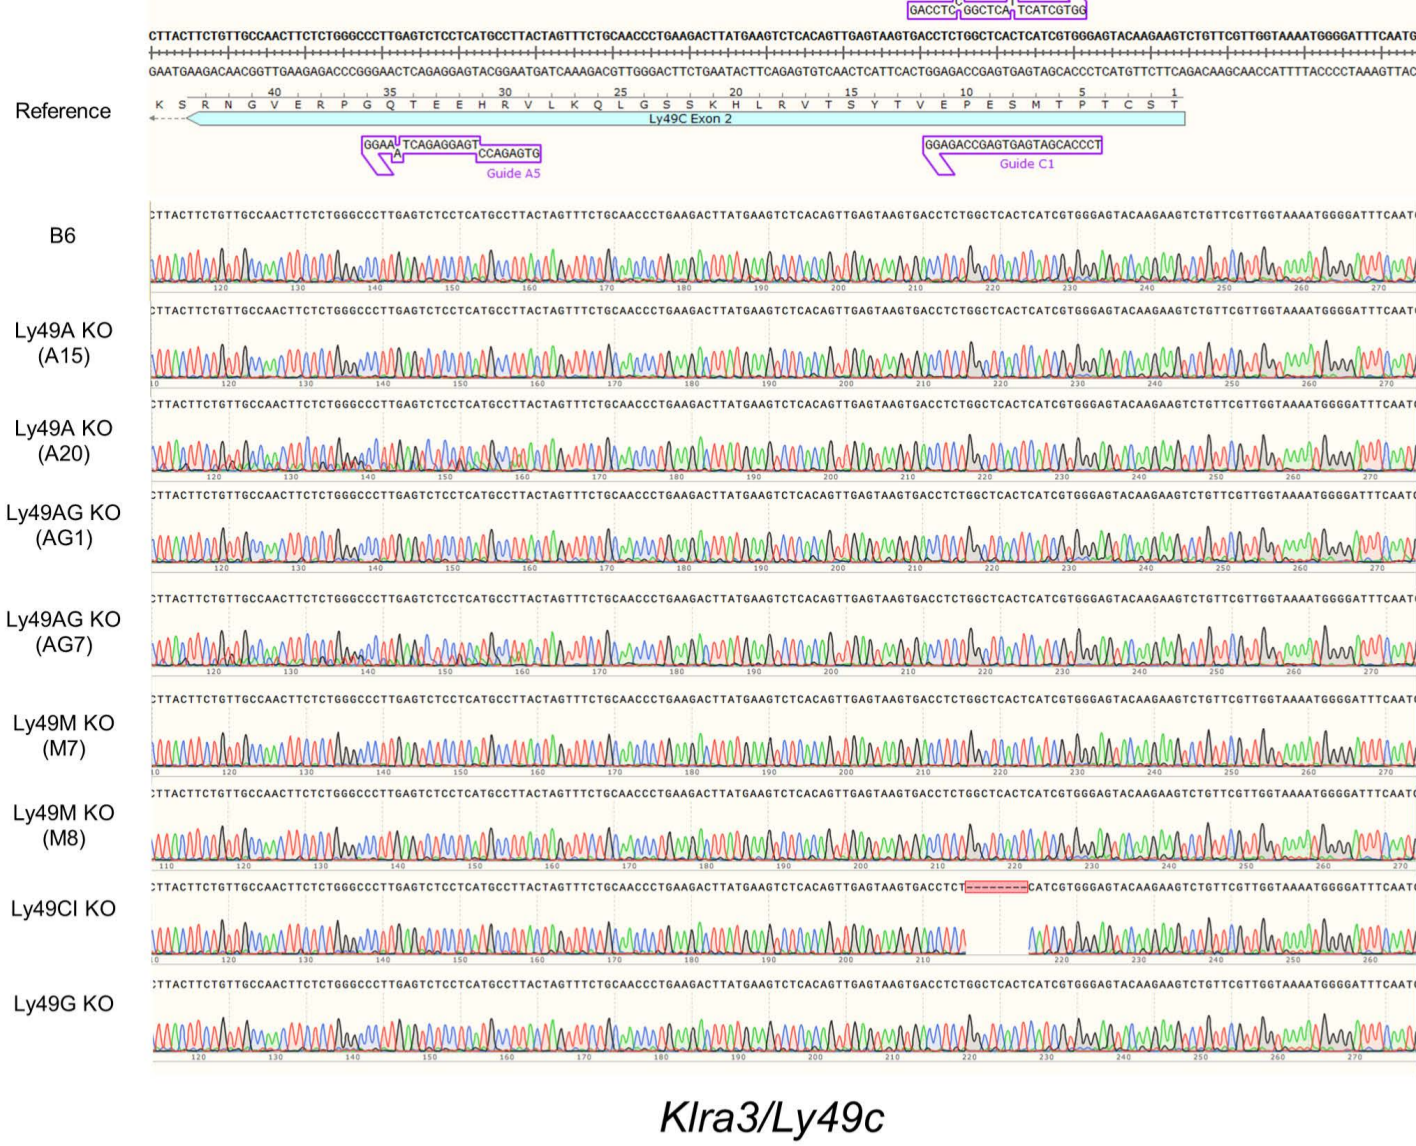

D.

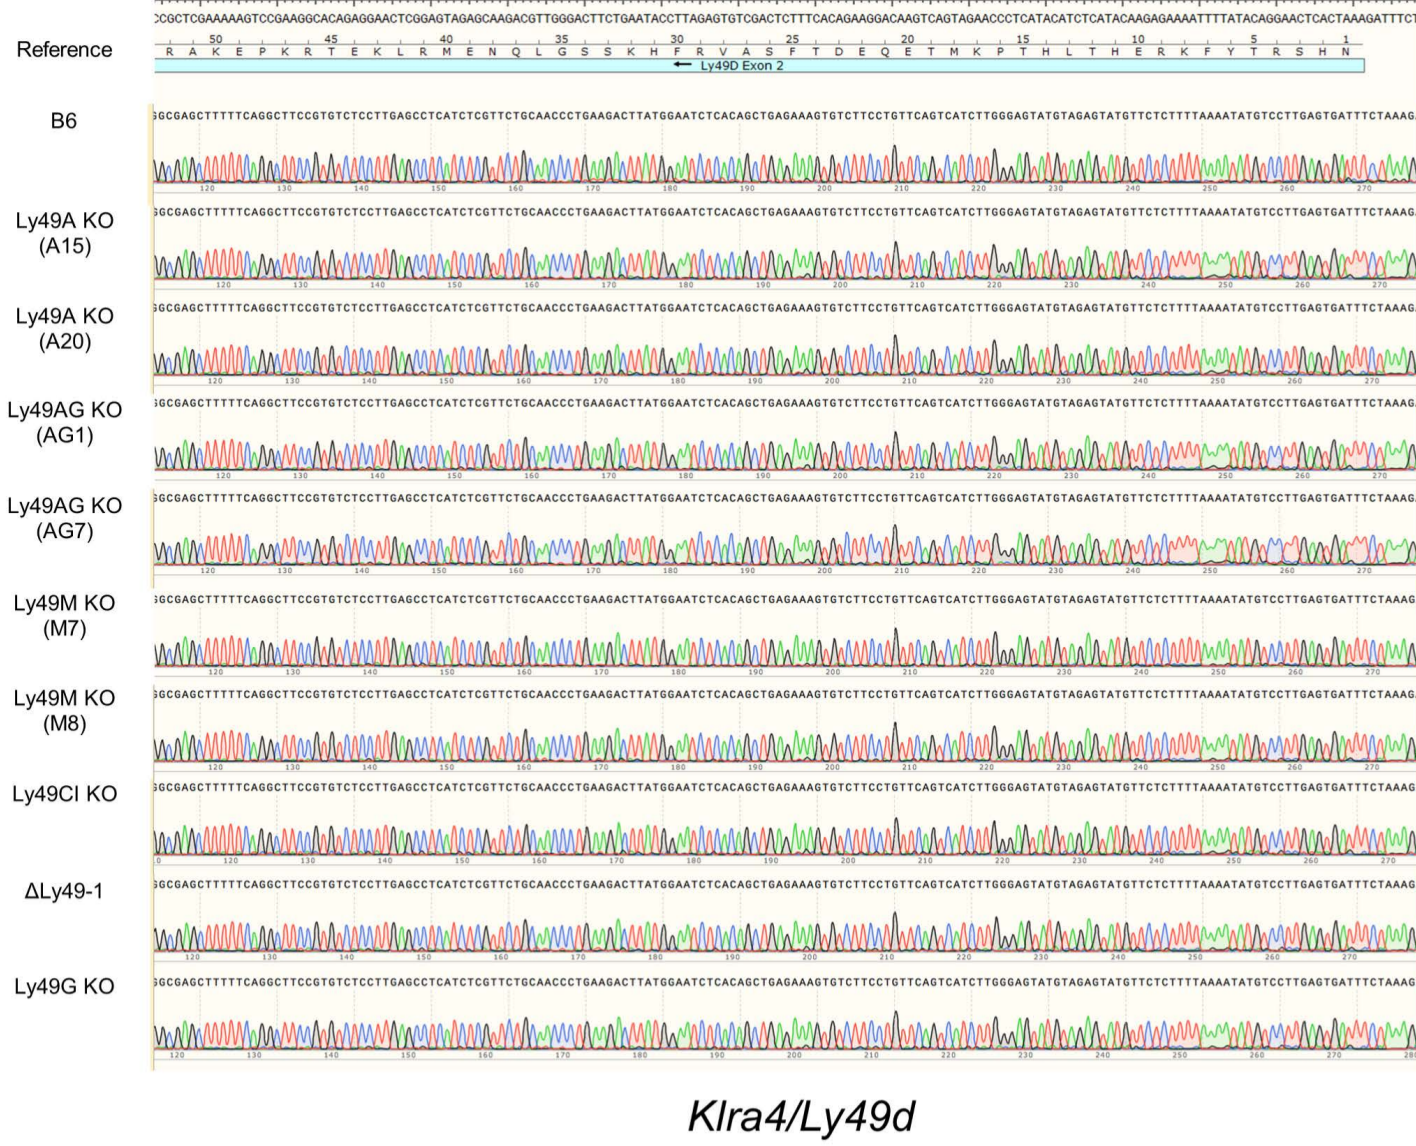

E.

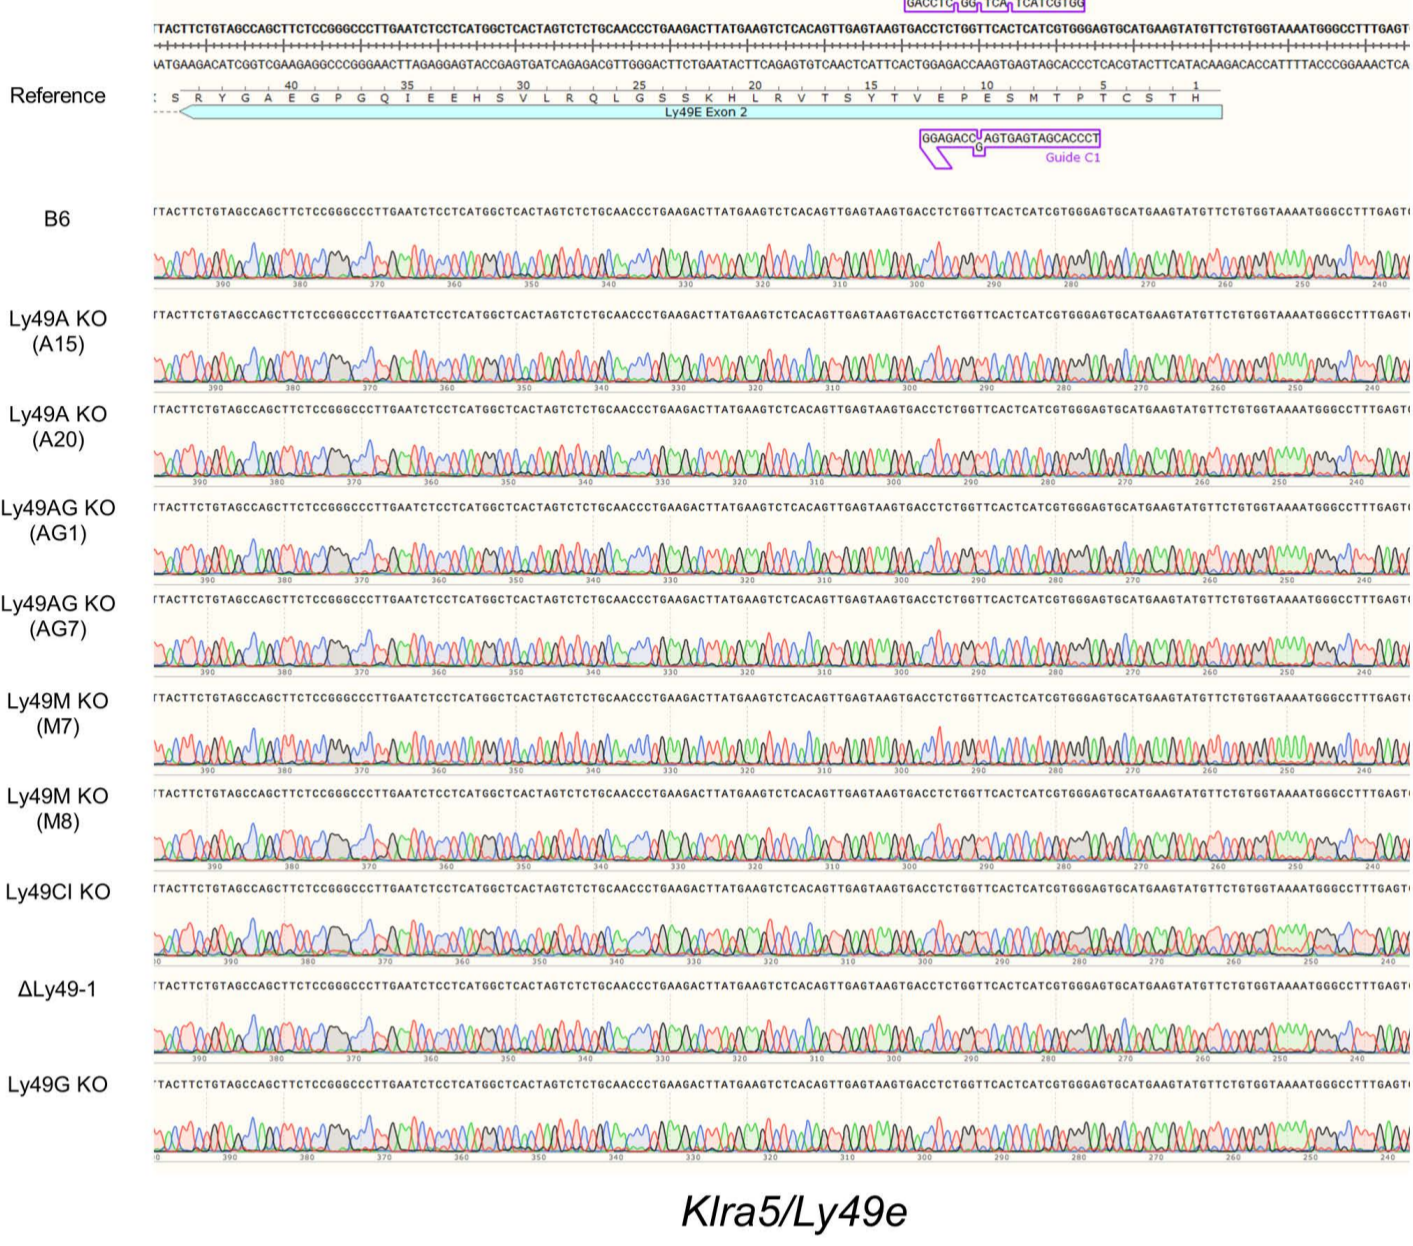

F.

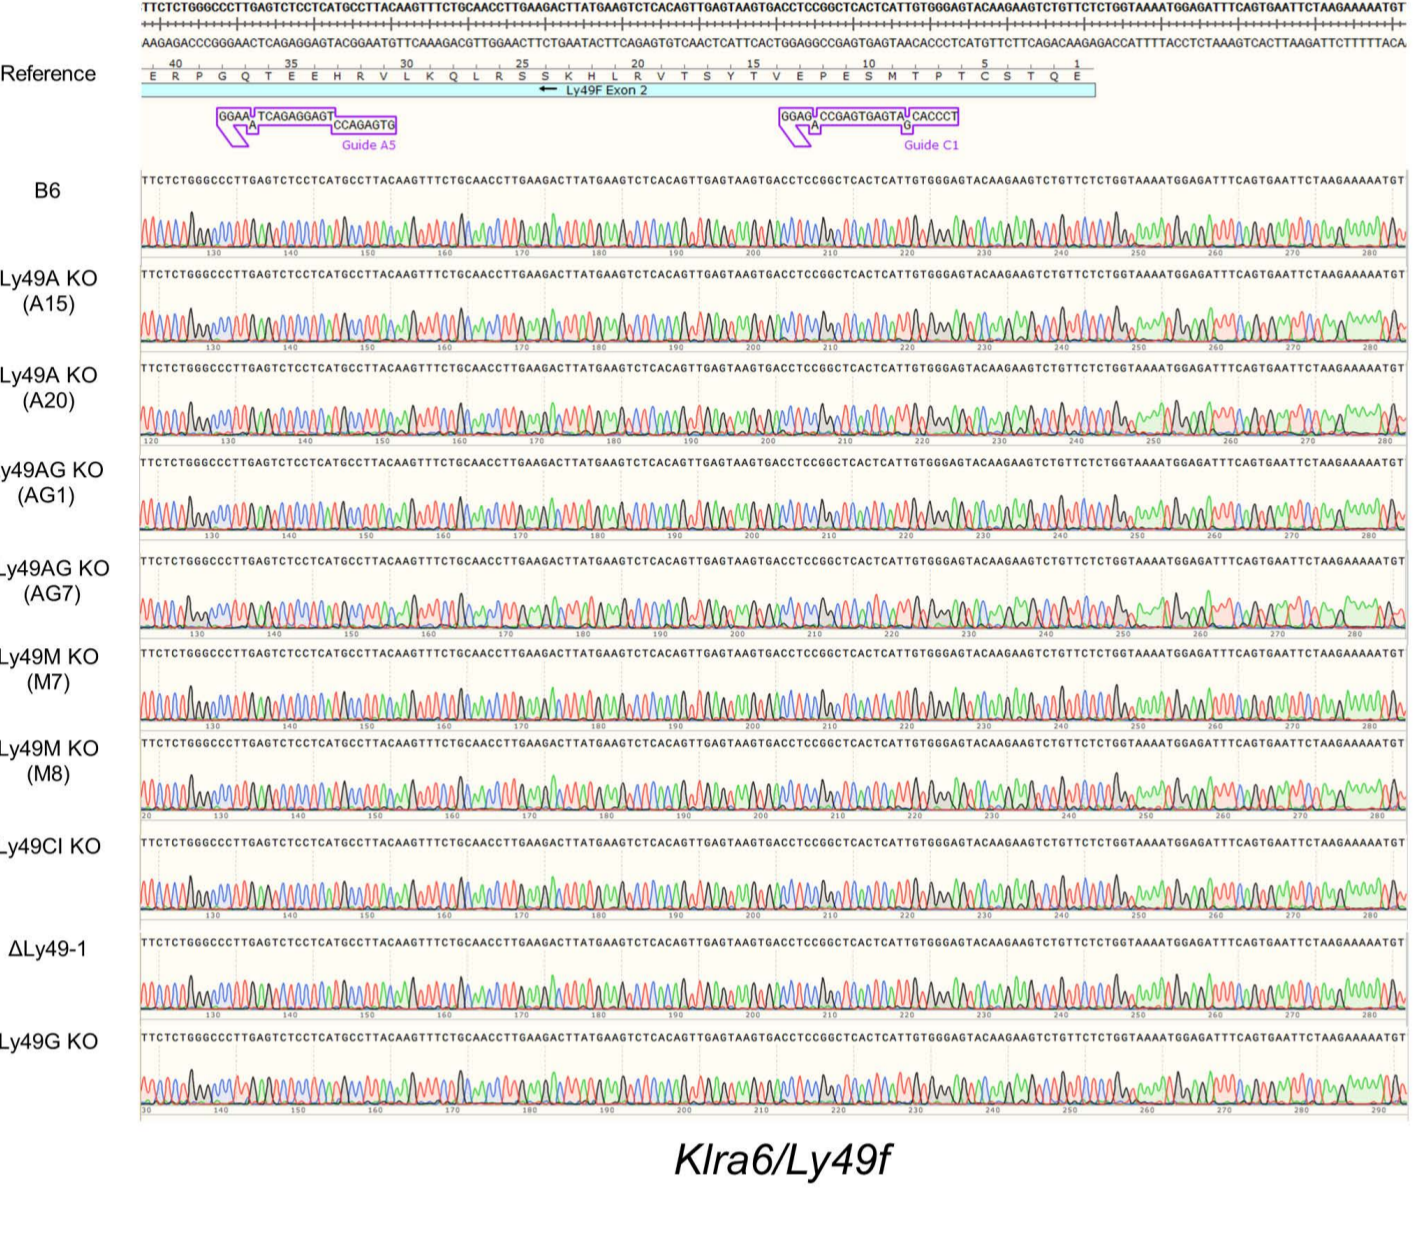

G.

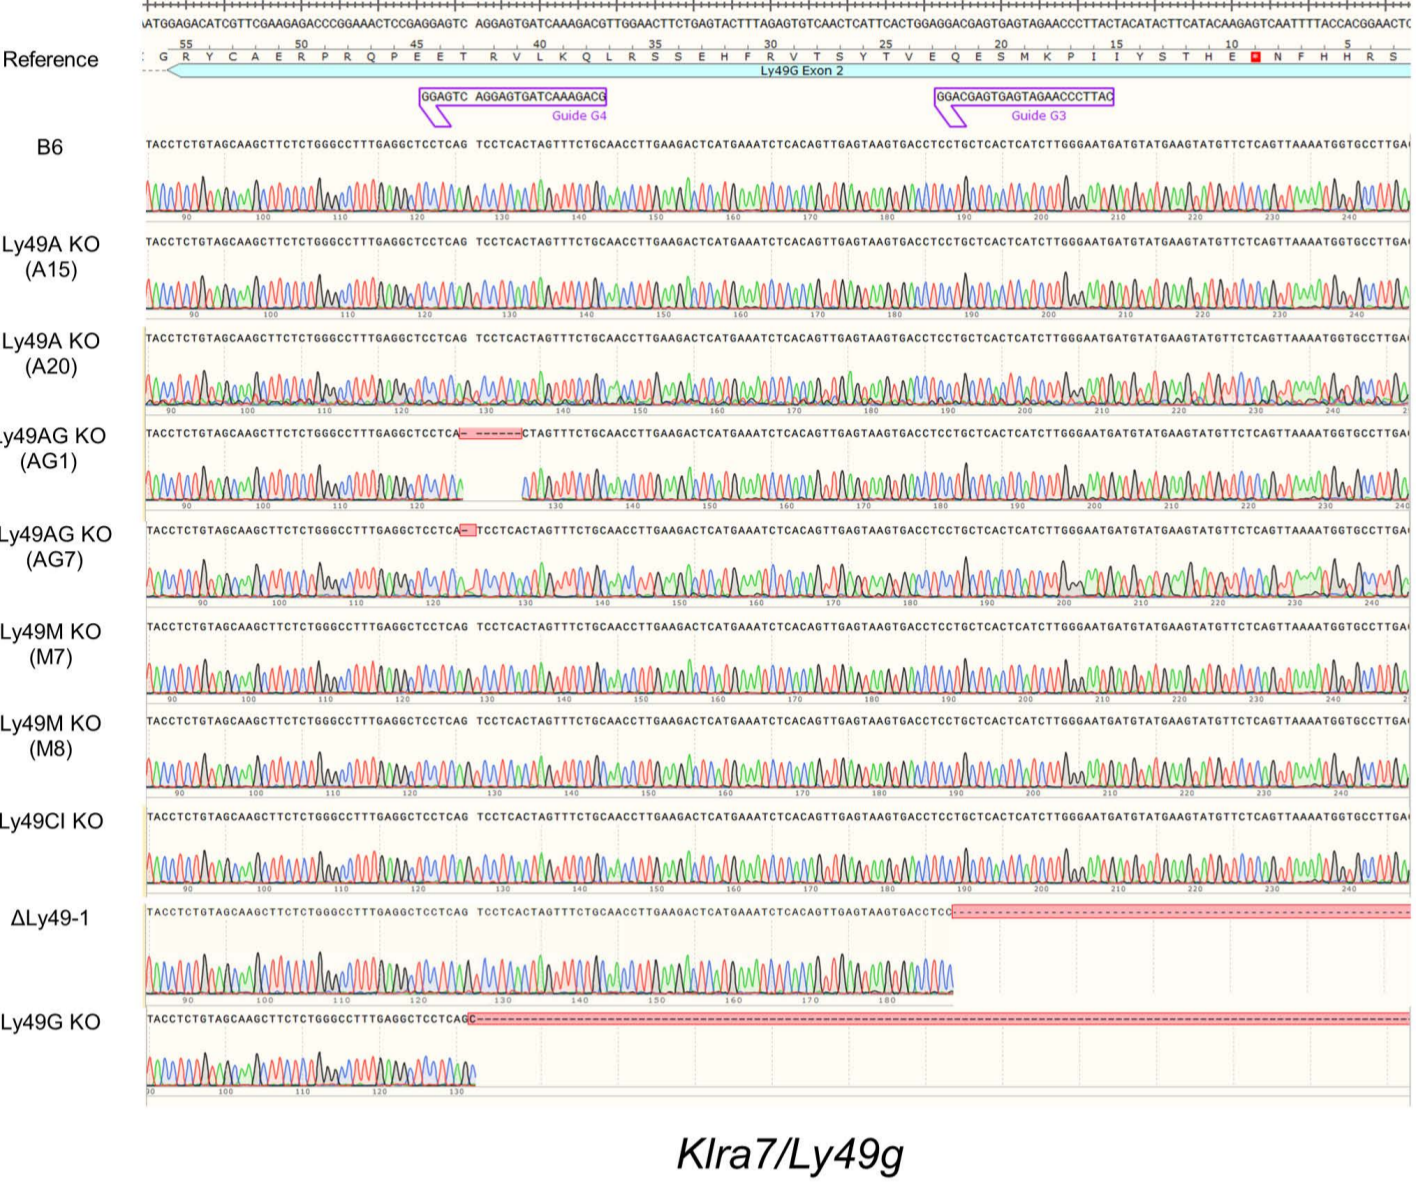

H.

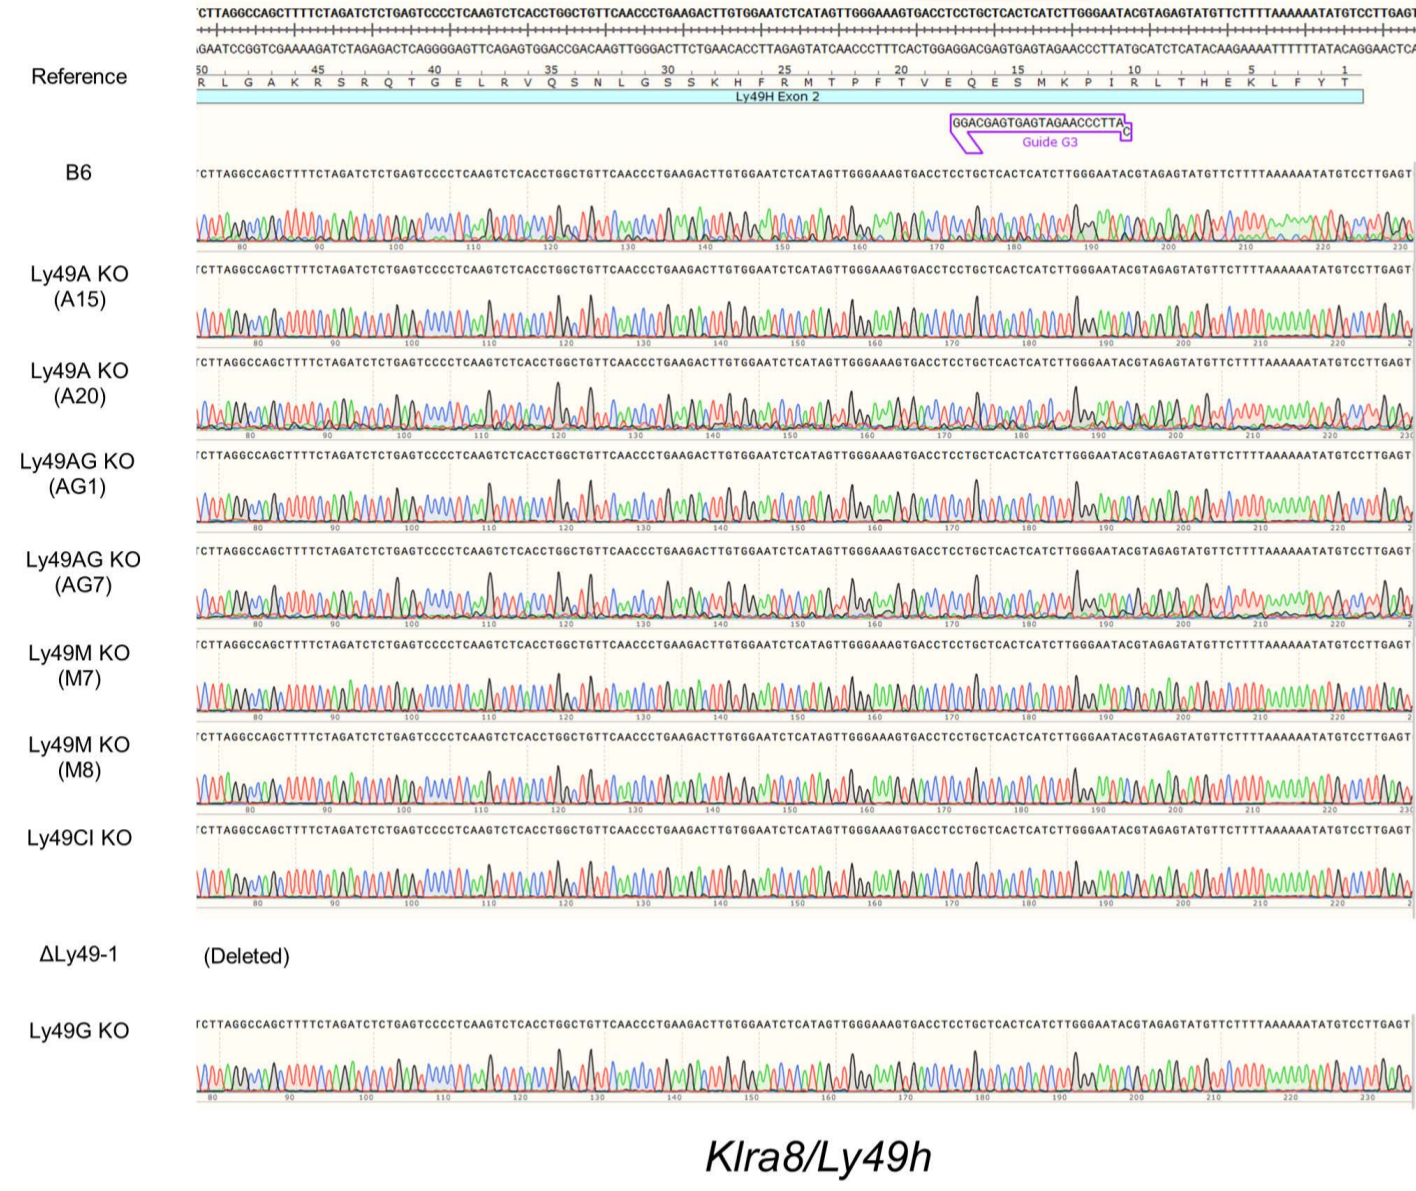

I.

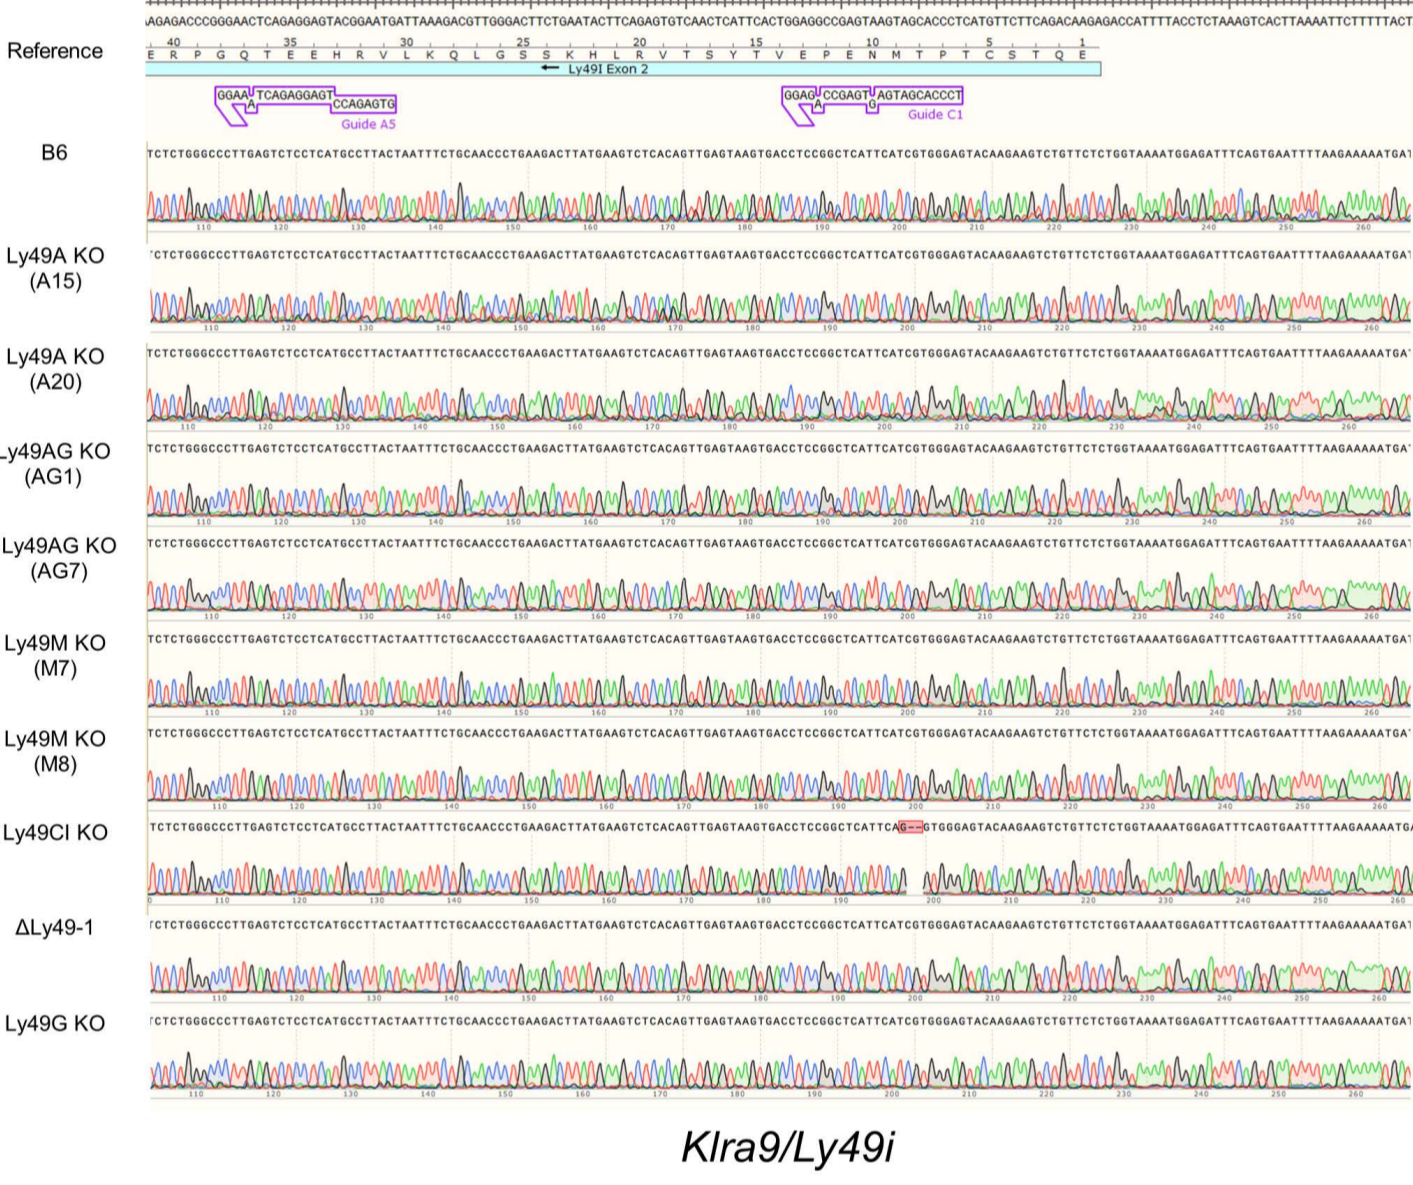

J.

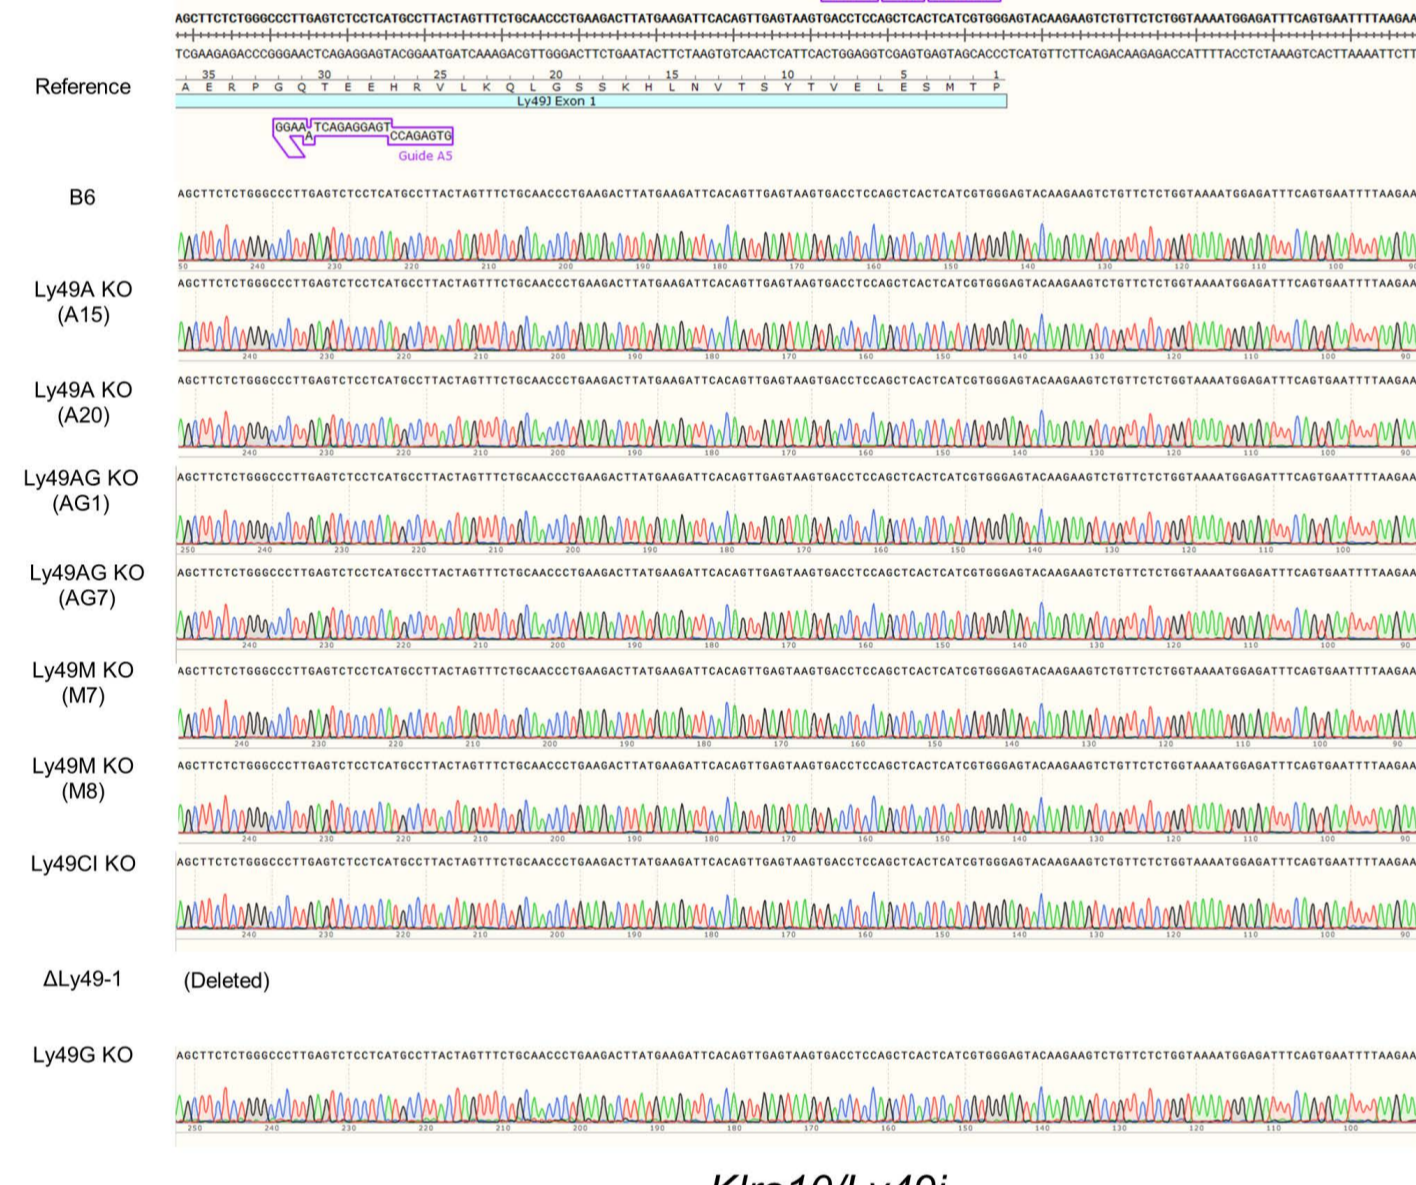

K.

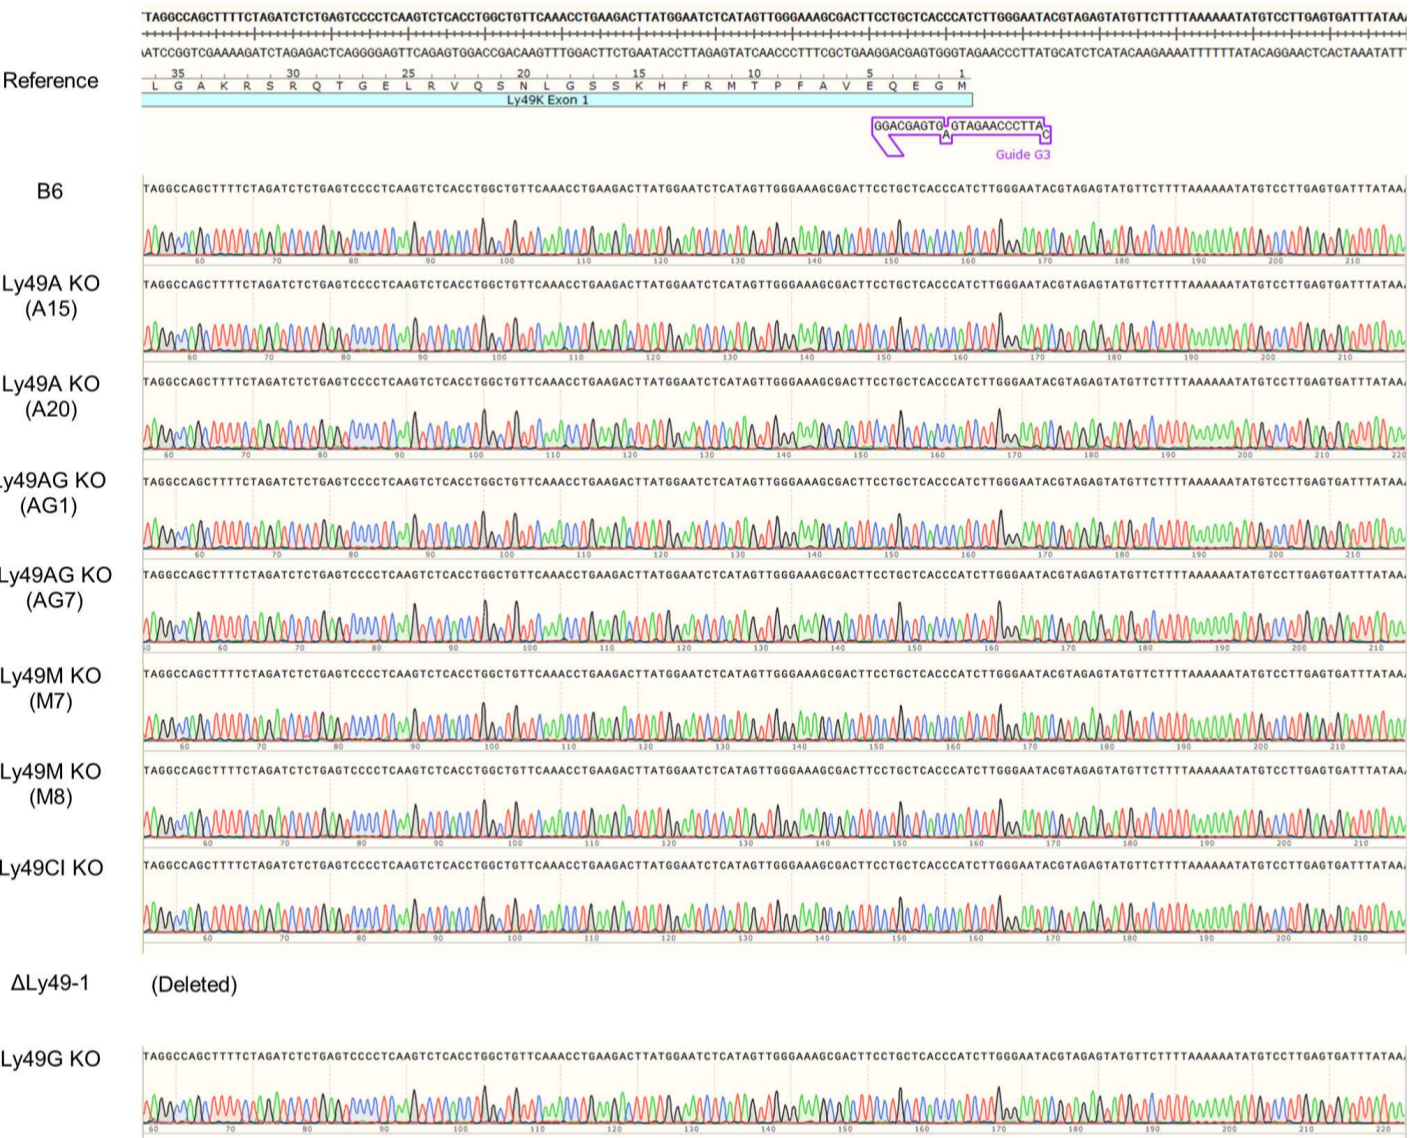

L.

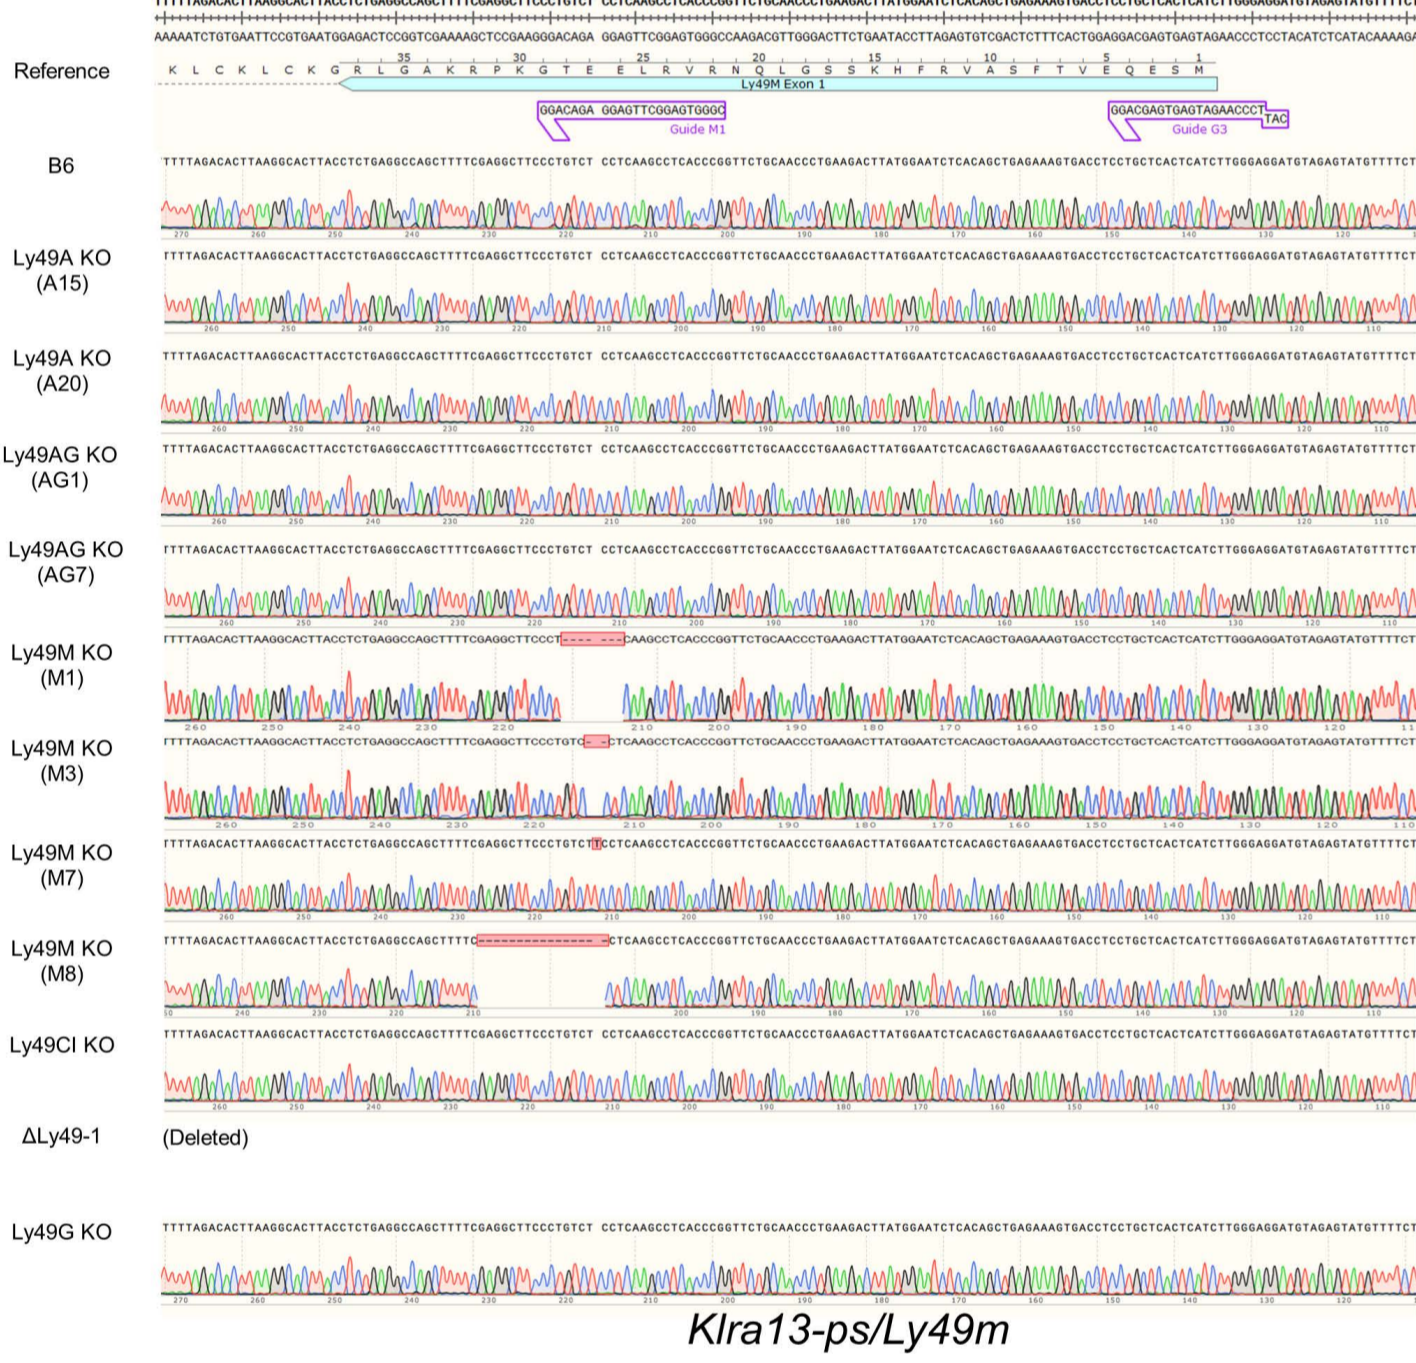

M.

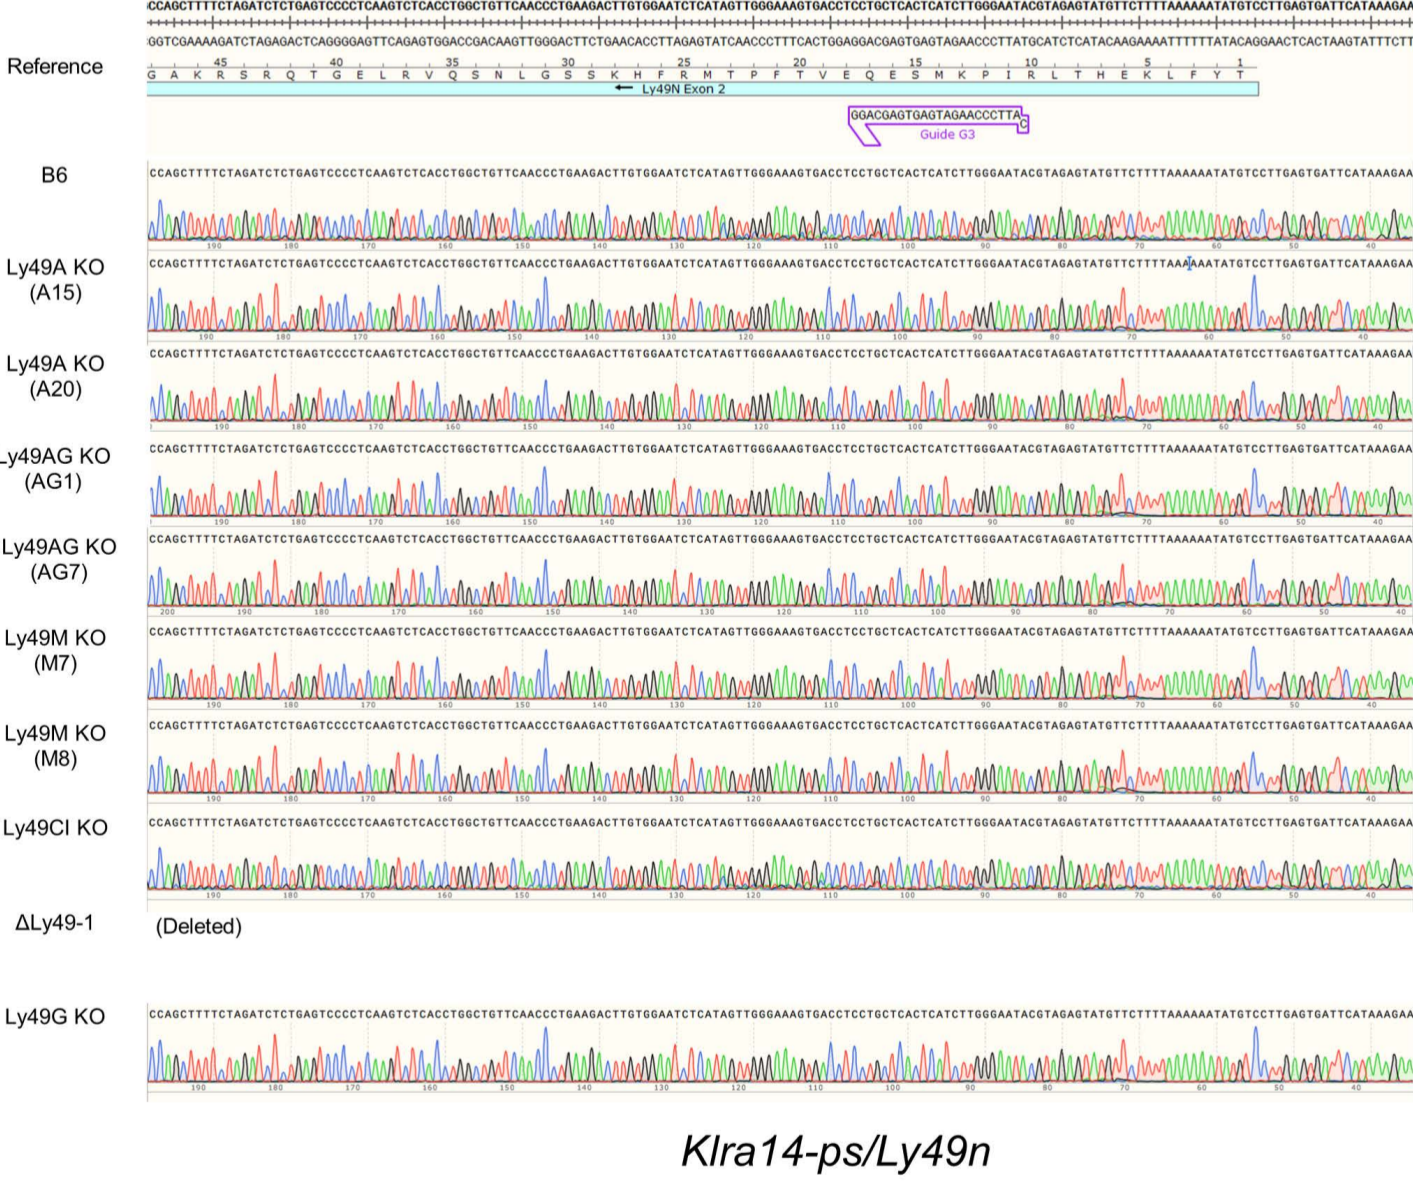

N.

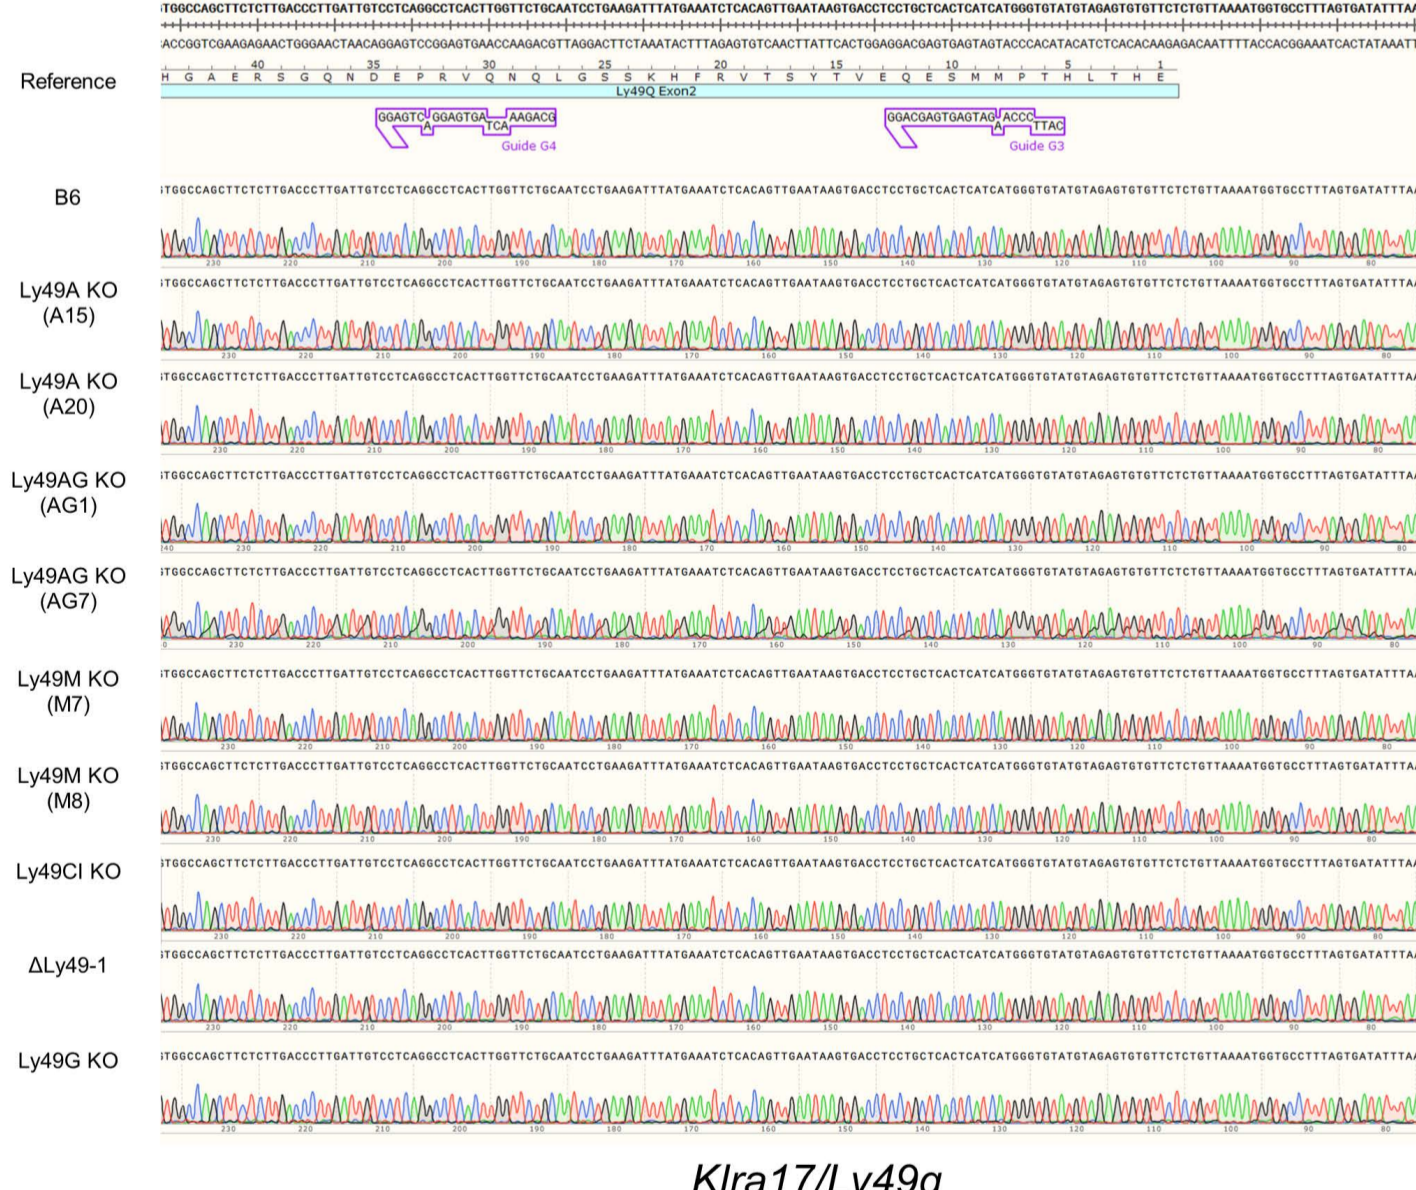

O.

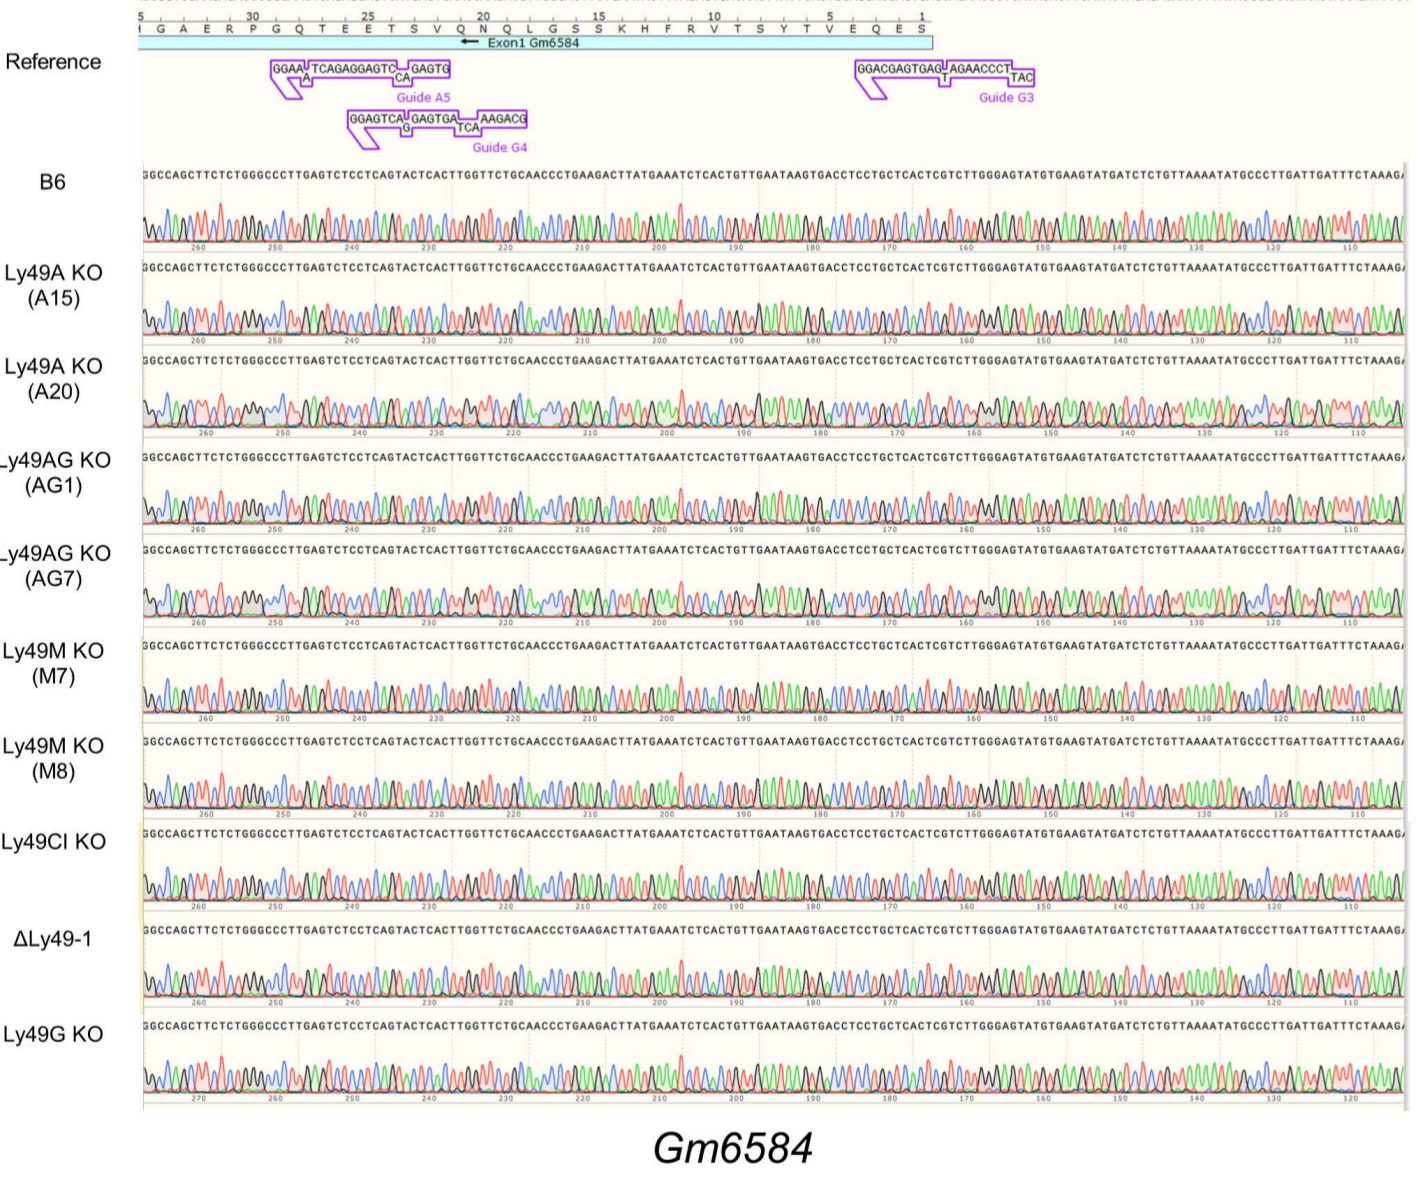

P.

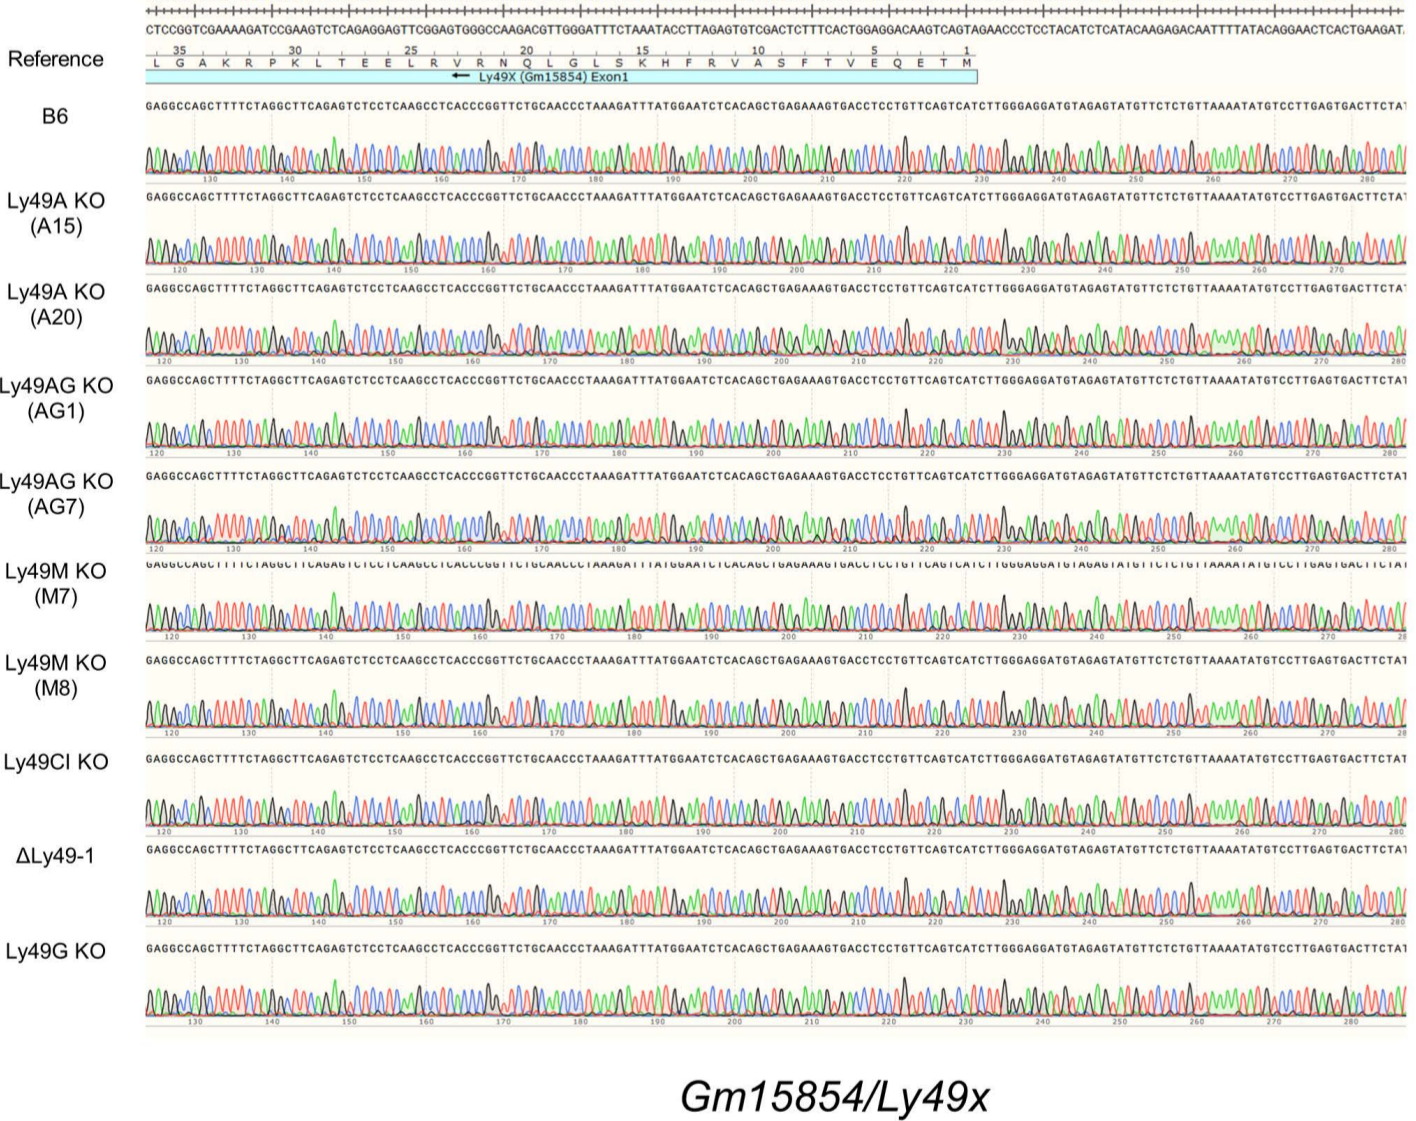

Q.

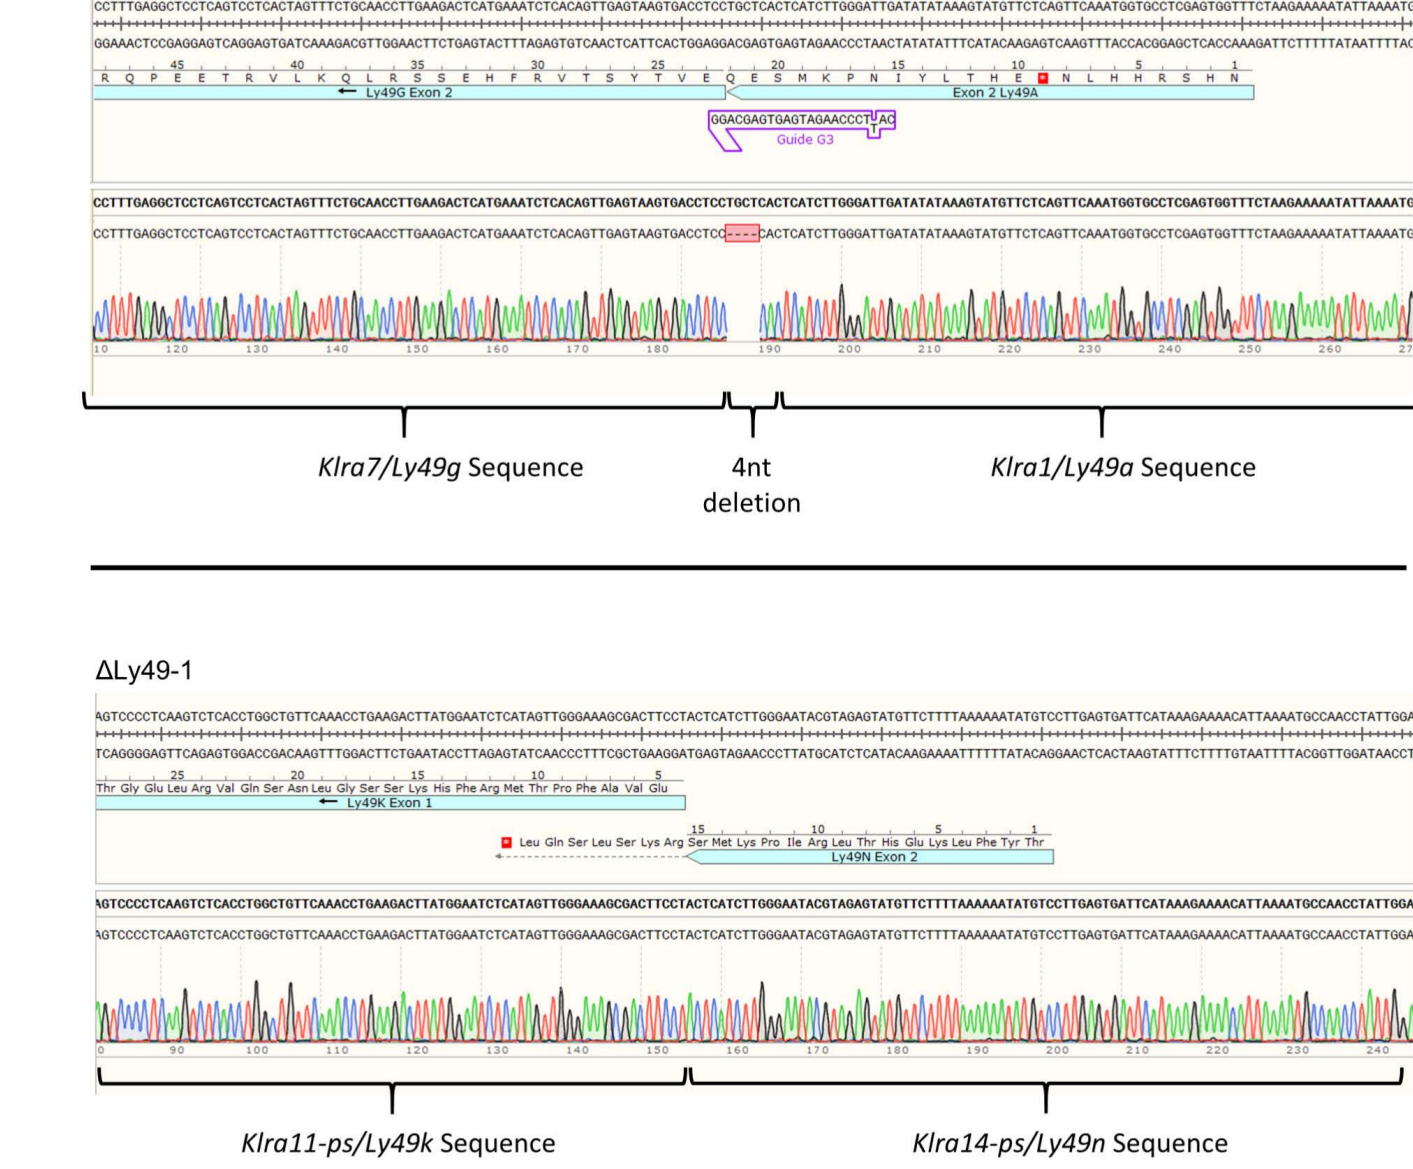

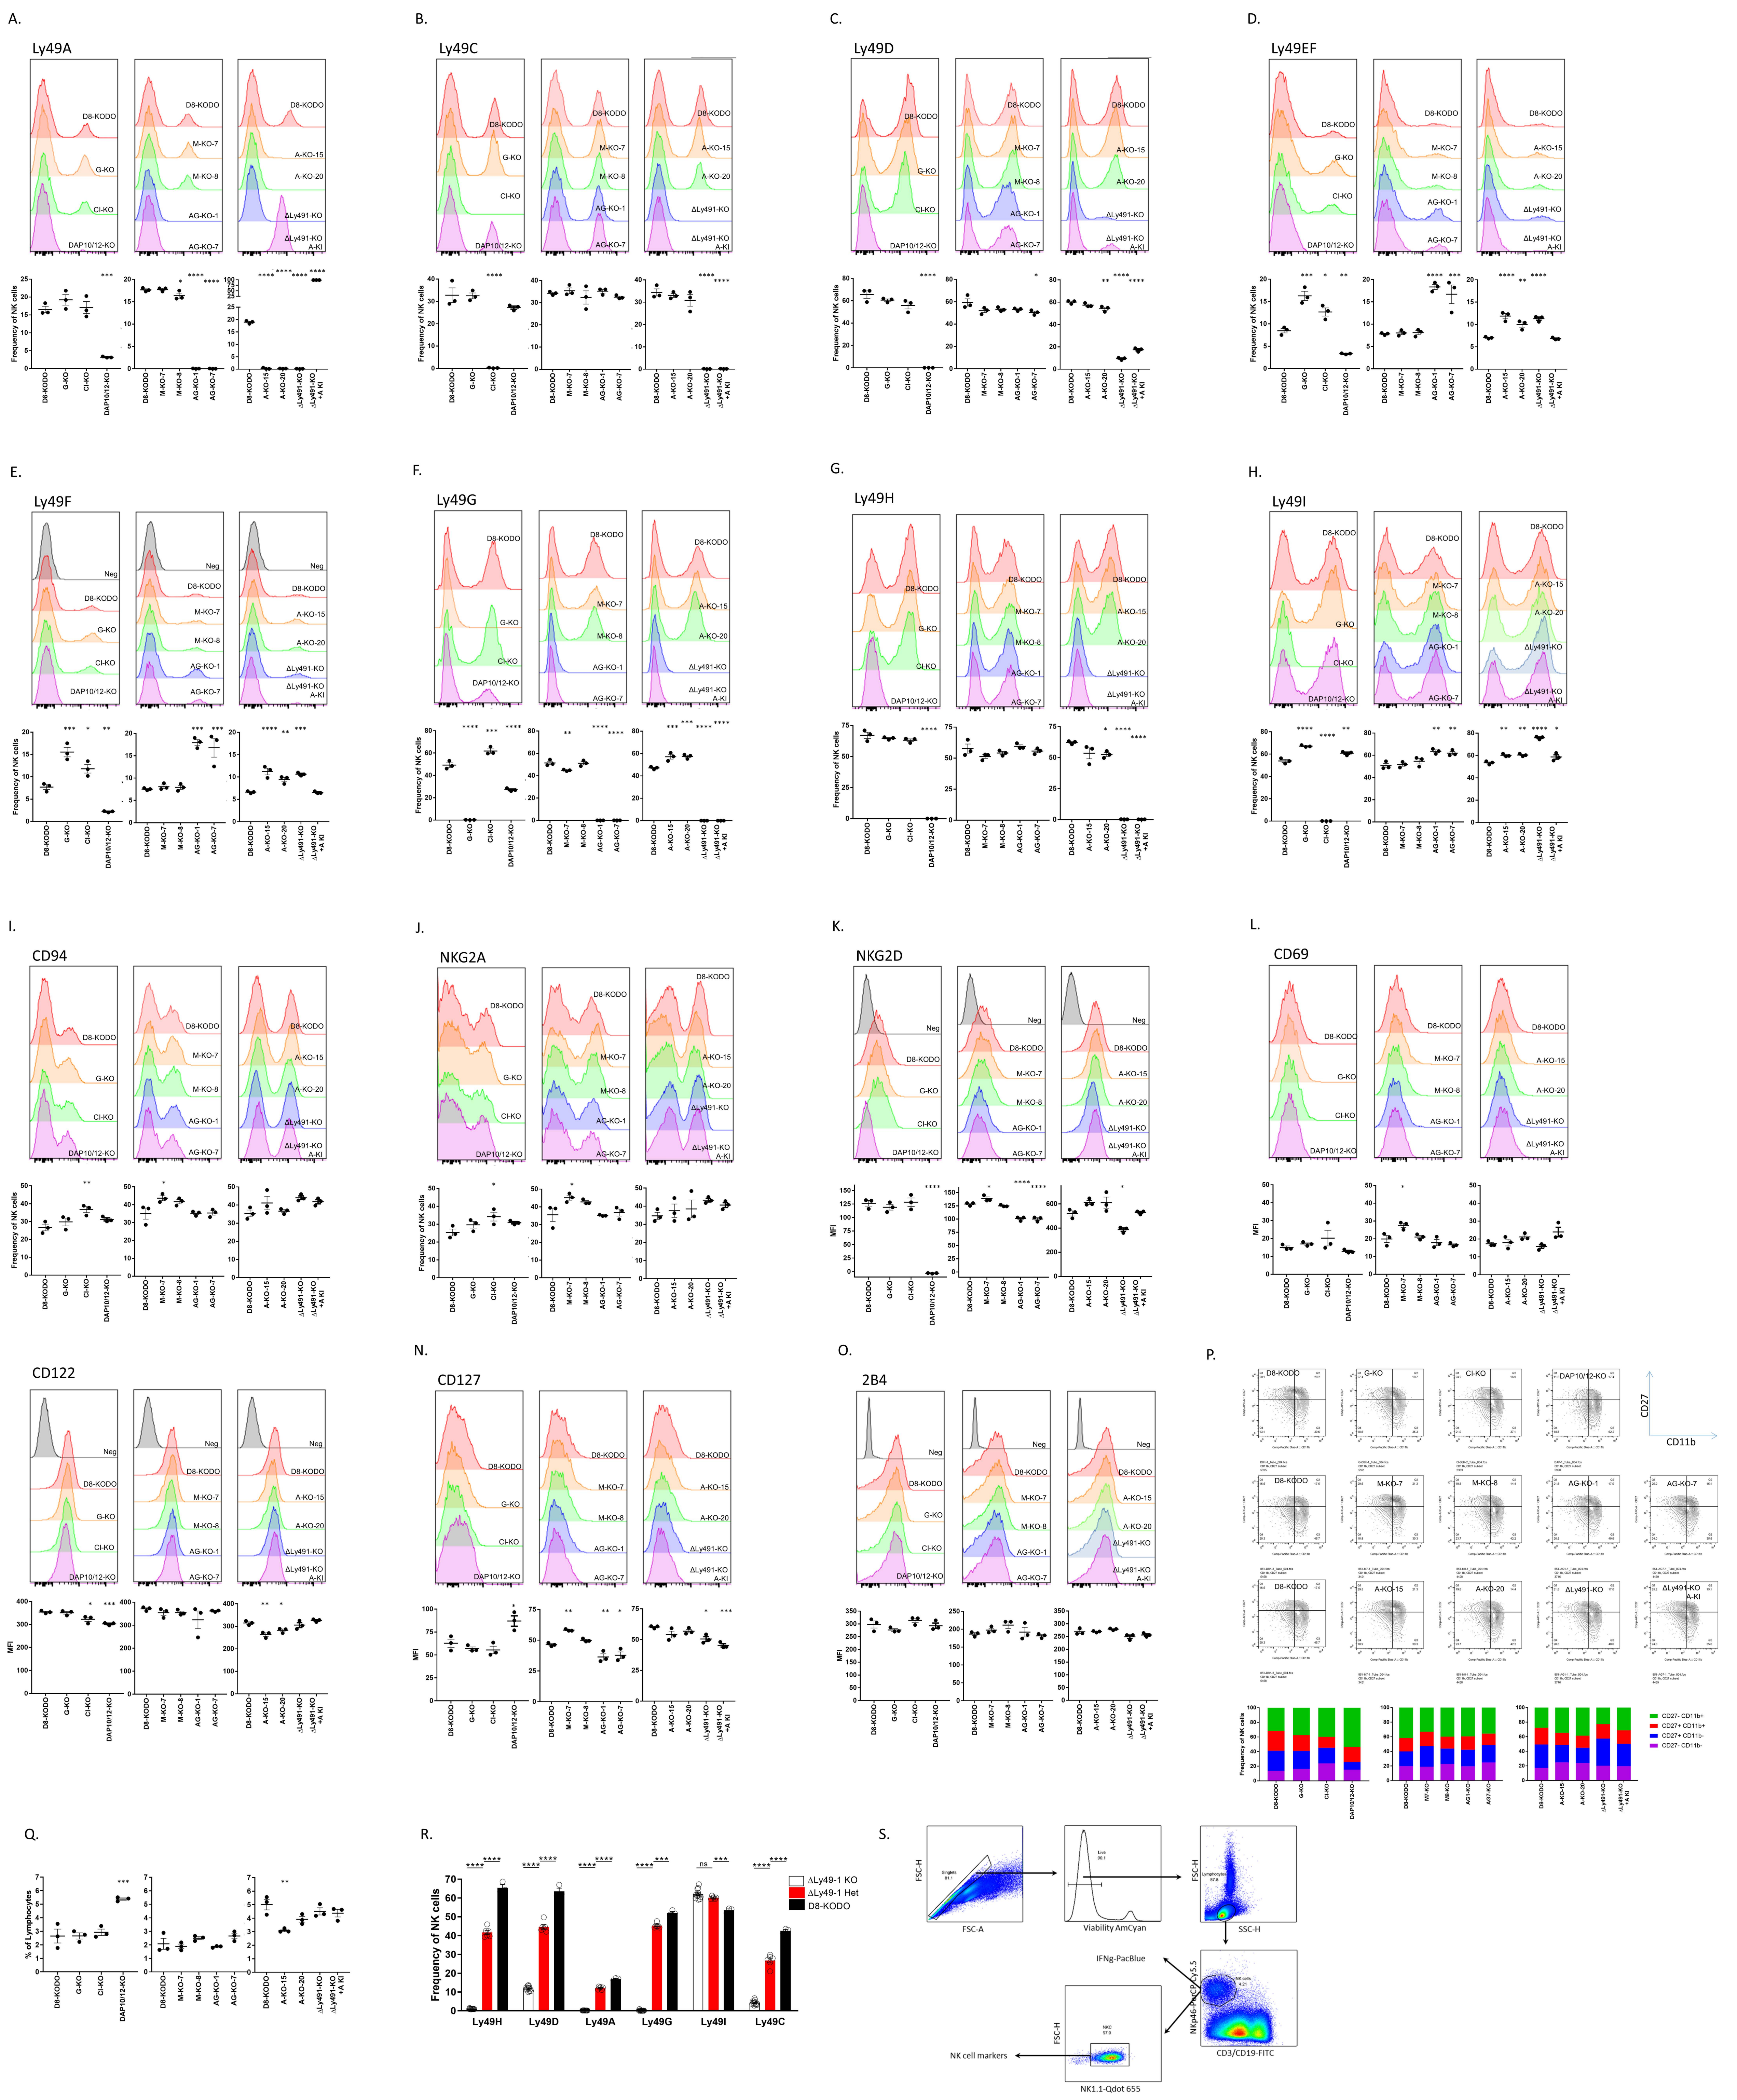

A.

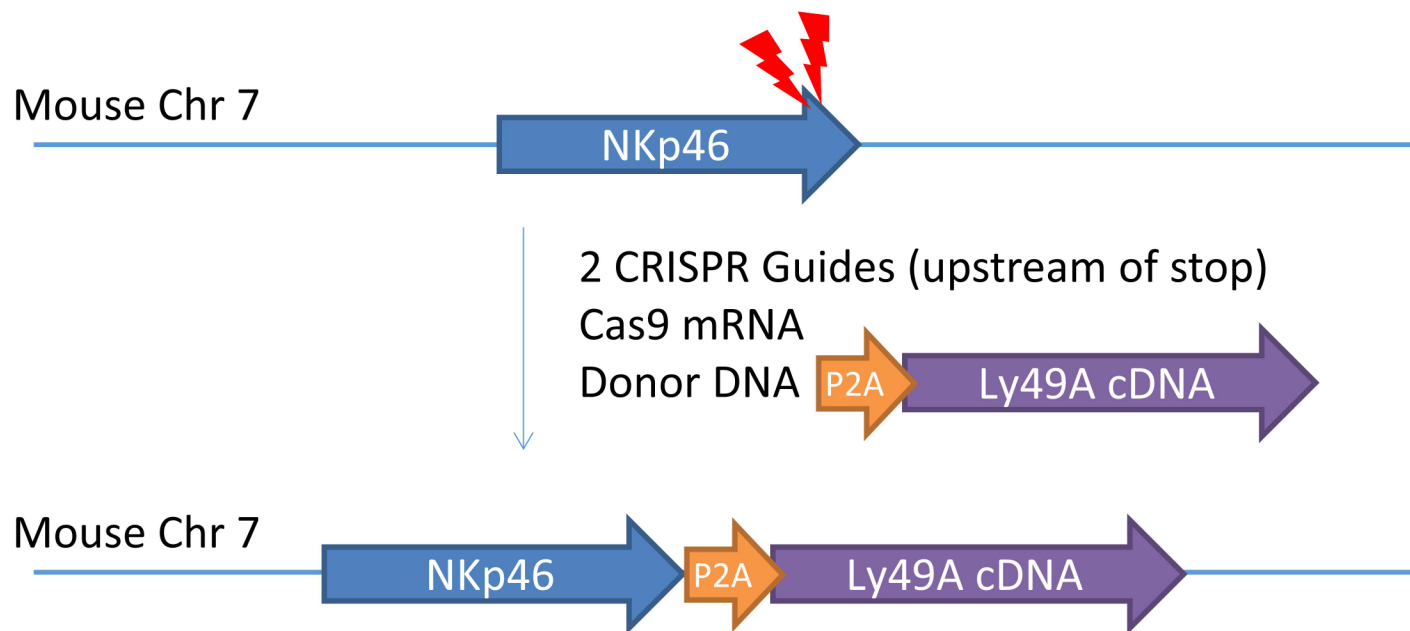

B.

Segment of chr7:4344460-4345184 (GRCm38/mm10)

Exon 7 coding region of Ncr1 / 3' UTR of Ncr1

Replaced with P2A-Ly49A cDNA

actccgccttctgggatcacacaaccagaatctcattcgaattggtctggcatgcataatcctgataactctagtagtggctttgactgaagactg  
gctcagcaagaggaaagatcatgaagaggccaacagattaacaaattggaatgcaggagaagatggagaatgcagcattacttgaaga  
ggaacaaagaaatgcaatatctatgatggaactgaaggcaactcctggggcattg **tgagctctatgctgtaccctggataaagaaagagatct**  
ttcagaaatgaaggggtaggagtgtaccaagtttgcaaagcattctaaaggacactgtgagaggaagcctctaacagacctctctgtctct  
gctaagctttaagtactttaacgcttattactgcaagttatactttgacactctggtcttctctagaaataacttcgttccaatgtgatggccatggga  
atatttccttctactttaggtcttctcgtcatttcttttaattttattttatgttgccgggaattgaactcaagttgtctggaggagcaacaagtgt  
cttaactacaaaccatatctccagctccatcctcaatattttatattgtgtgtgcatgtctgttaggatgcatgtgtgtgcacacatatgtacatatattct  
atgccattaaaatgaaggtcagagaacacctctgtgaagtca

ggatctggagcaacaaacttctcactactcaacaagcaggtgacgtggaggagaatcccgggcctatgagtgagcaggagggtcacttattc  
aatggtgagatttcataaatctgcaggattgcagaaacaagtgcagacctgaggagactaaagggcccagagaagctggctacagaaggtg  
ttcattccactggaagttcattgtgatagctcttggcatcttctgttcttcttctggtagctgttccagtgttggaataaaaaattttcagtagatcaac  
aaaaaaaaactgcaggaatttctaaccaccacaataactgcagcaacatgcaaagtgcacatcaactgaaggatgaaatgctgaaaaata  
agtctatagagtgtgatcttctggaatccctcaacagggatcagaacagattgtataataaaaccaagactgttttagattccttacagcacaca  
ggcagaggtgataaagtatactggttctgctatggtatgaaatgttattttcgtcatggacagaaaaacatggagtggatgtaaacagacctg  
ccagagttccagtttatcccttctgaagatagatgatgaggatgaactgaagttccttcagctcgtggttccttcagacagttgctgggttgattgtc  
atatgataataagaaaaaagattgggcatggattgacaatcgccatctaaactgccttgaaacacaaggaaatacaatataagagatgggg  
gatgtatgtgttatctaaaacaagactagacaatggttaactgtgatcaagtattcatctgtattgtgggaagagactggataaattccctcattga

C.

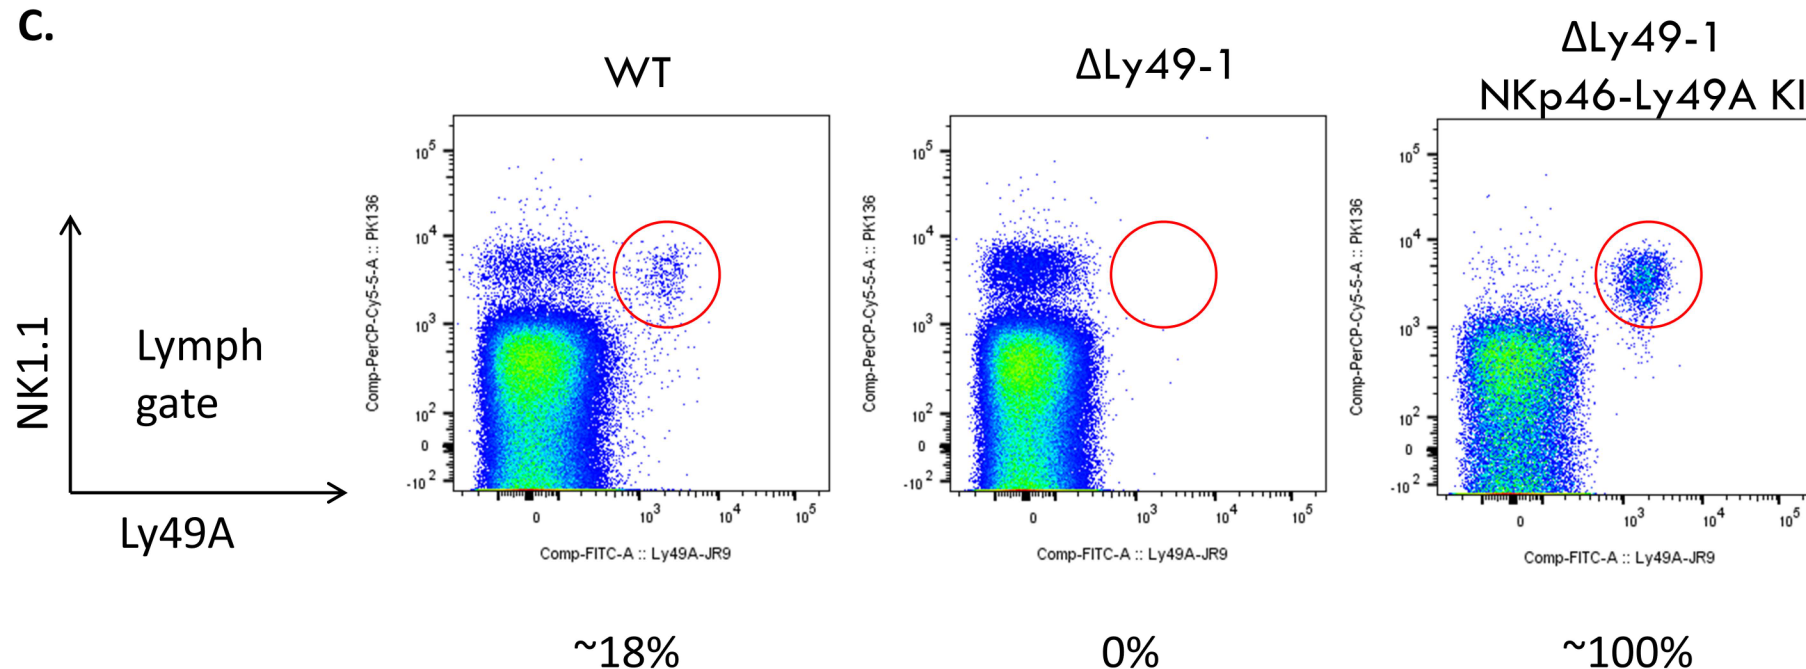

A.

Input

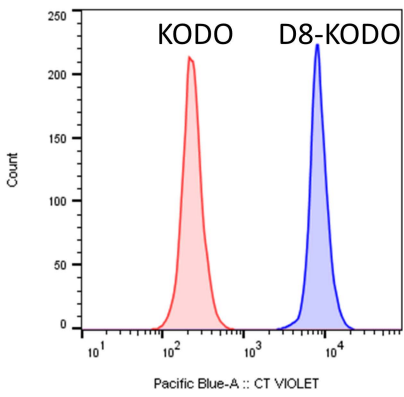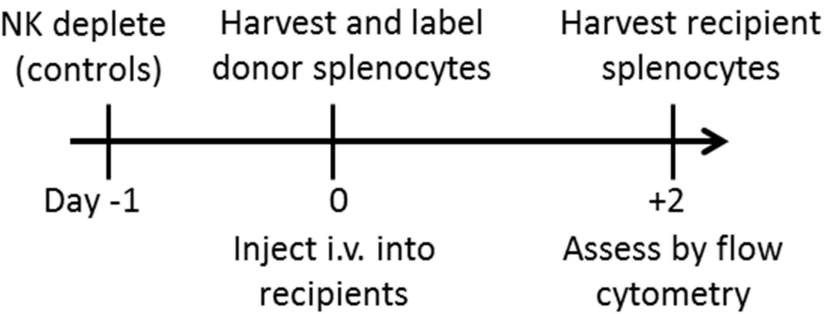

B.

No Depletion

PK136 depletion

Ly49G2 depletion

D8-KODO

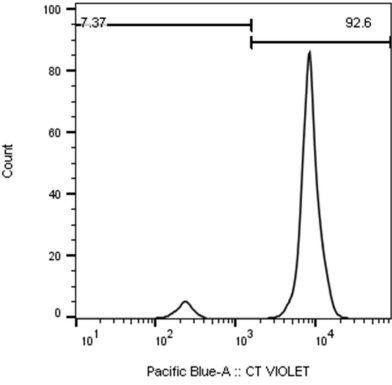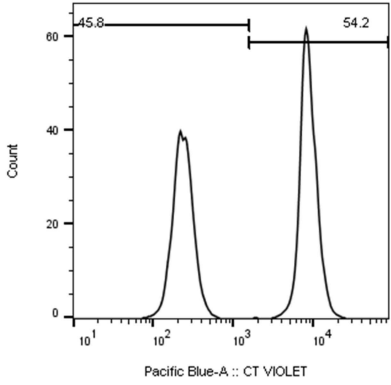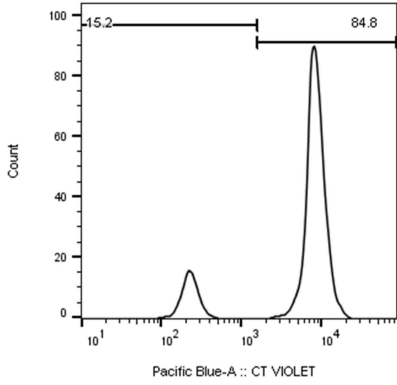

AYF-D8-KODO

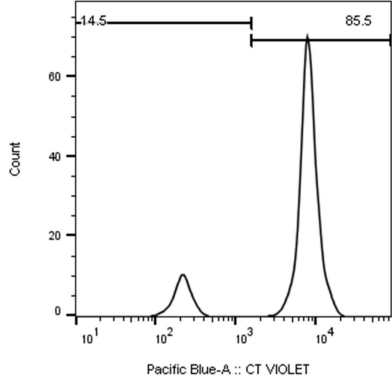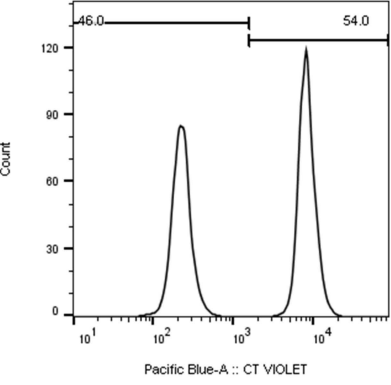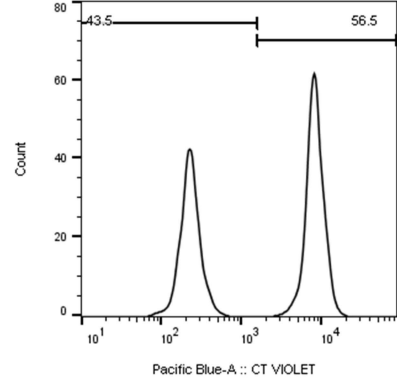

AG KO-D8-KODO

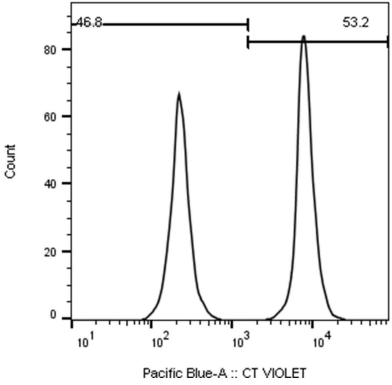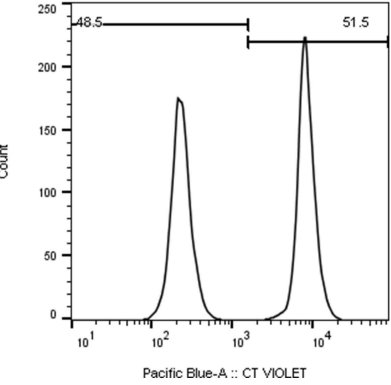

Not done  
(no Ly49G+ NK cells)

C.

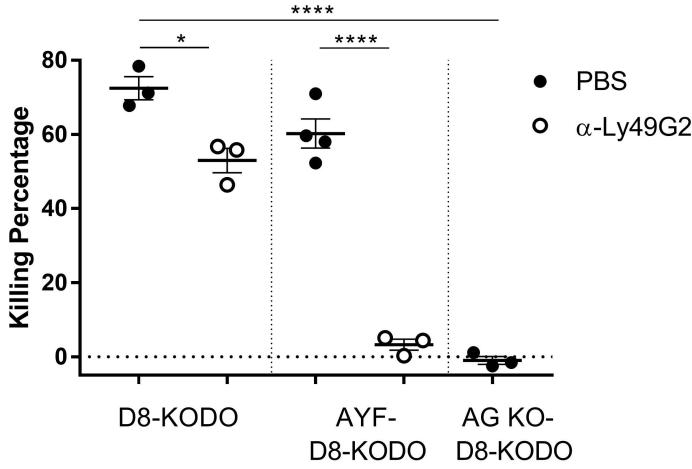

A.

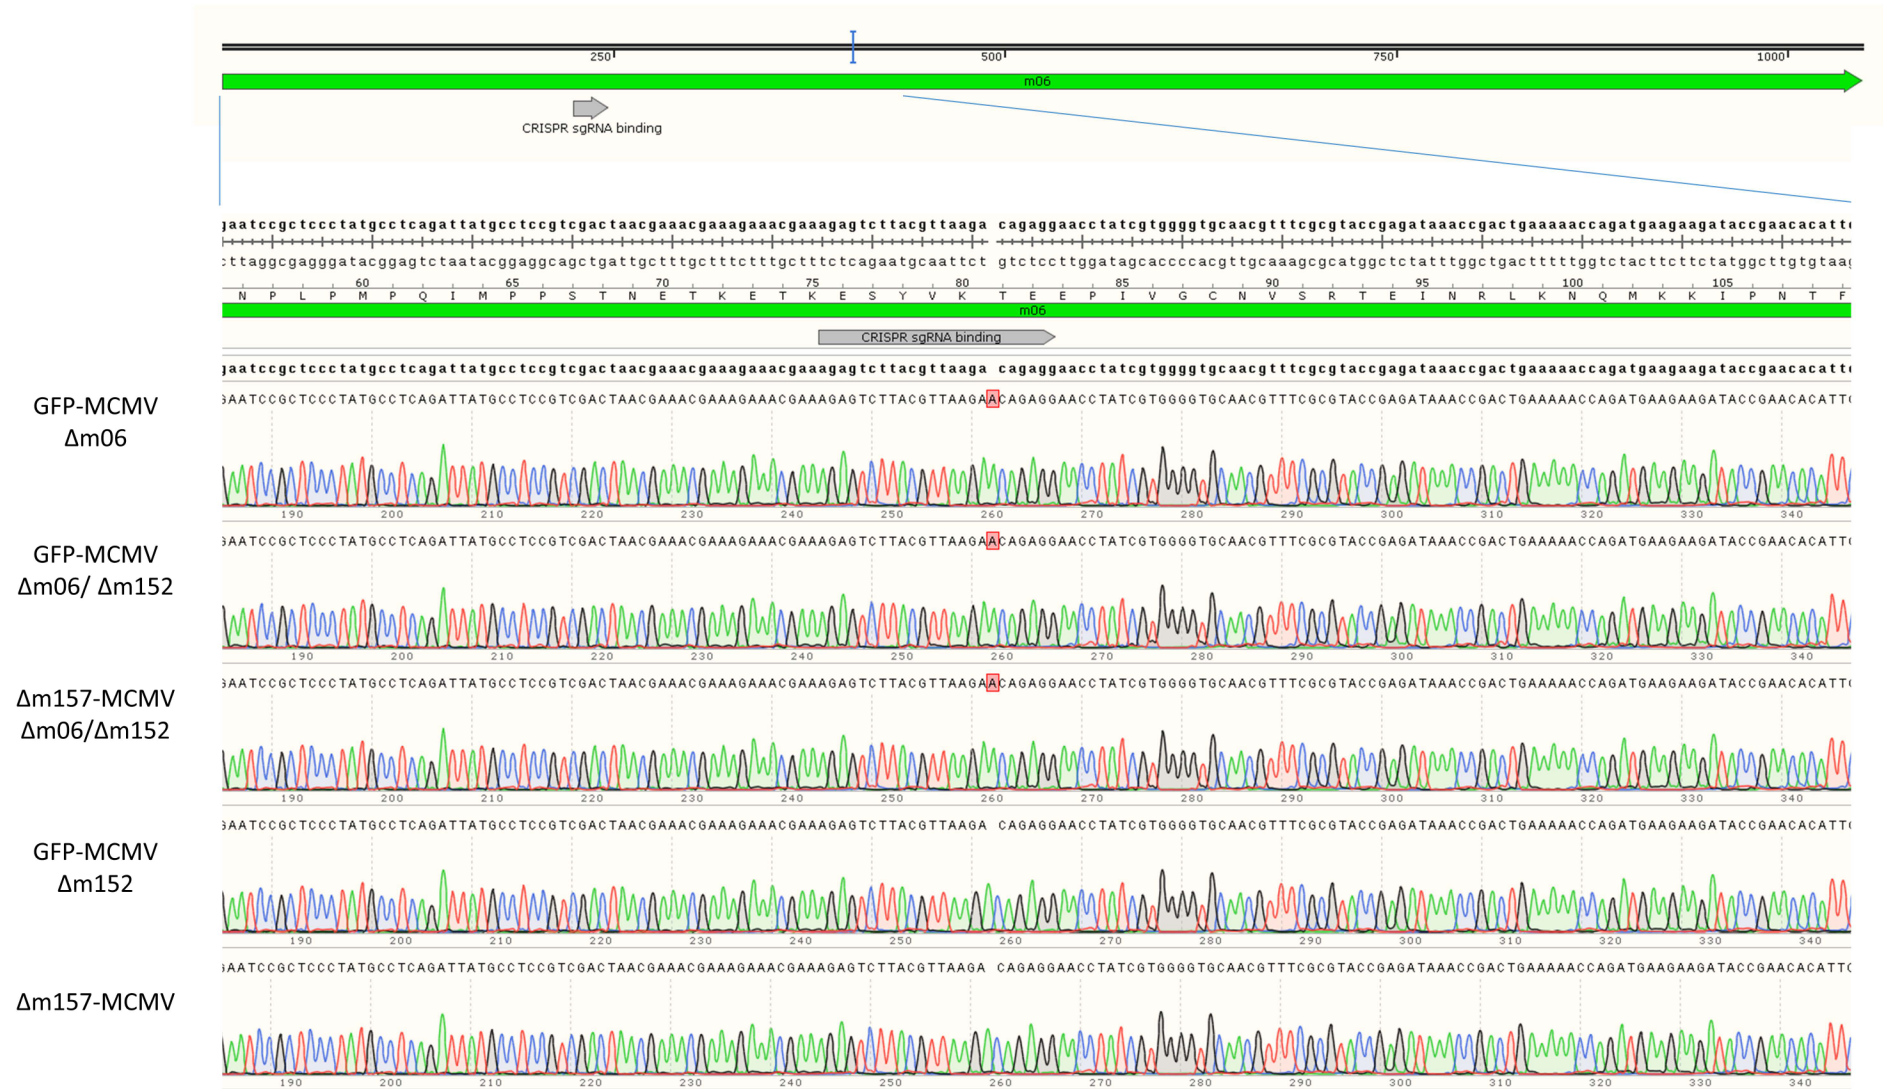

B.

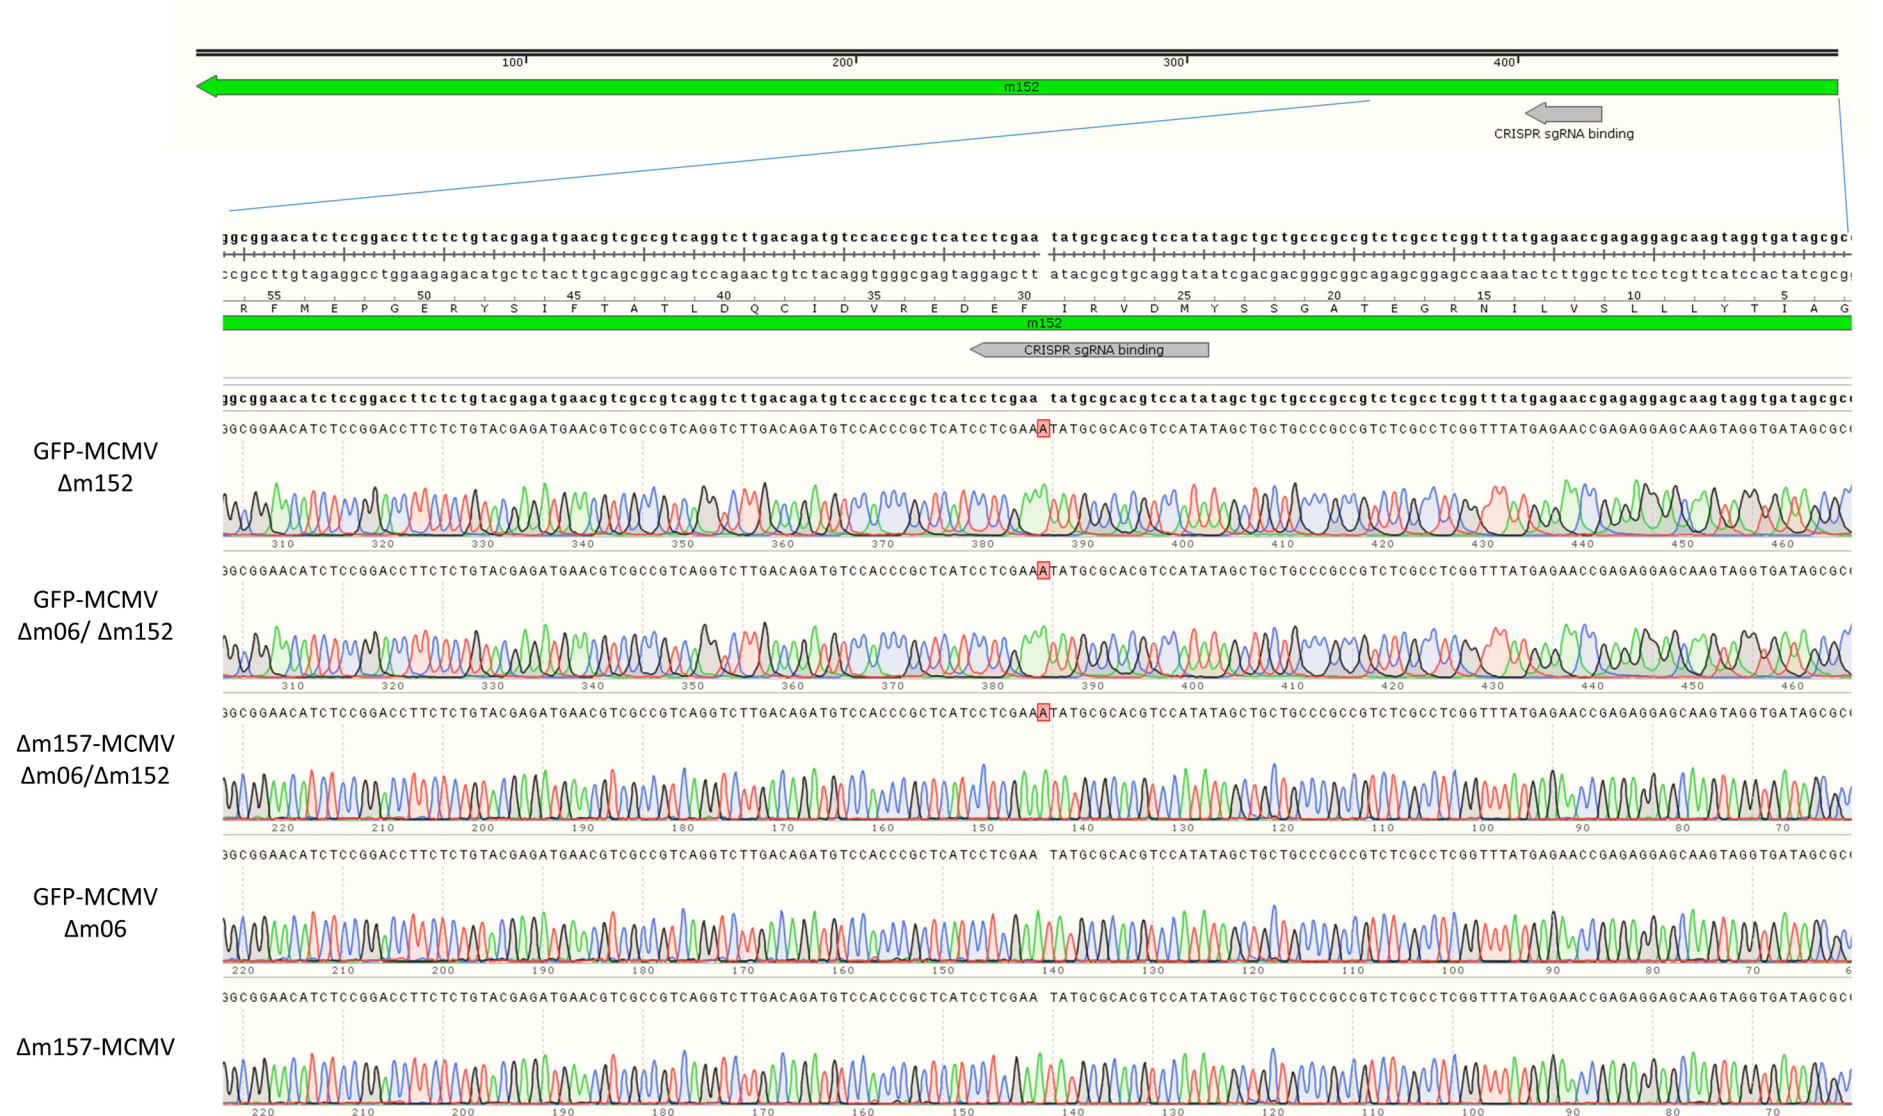

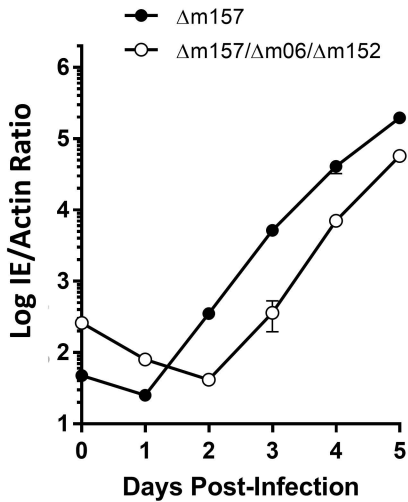

## Supplementary Tables

**Table S1: sgRNA used in generation of CRISPR-Cas9 modified mice**

| Guide ID | Target           | Sequence + <u>PAM</u>             | Mouse Generated    | Chr |
|----------|------------------|-----------------------------------|--------------------|-----|
| G3       | <i>Ly49g/a/h</i> | CATTCCCAAGATGAGTGAGC <u>AGG</u>   | ΔLy49-1            | 6   |
| I2       | <i>Ly49i</i>     | GACCTCCGGCTCATTTCATCGT <u>G</u> G | C14B               | 6   |
| C1       | <i>Ly49c</i>     | TCCCACGATGAGTGAGCCAGAGG           | C14B               | 6   |
| M1       | <i>Ly49m</i>     | CGGGTGAGGCTTGAGGAGAC <u>AGG</u>   | M1, M4, M7, M8     | 6   |
| G4       | <i>Ly49g</i>     | GCAGAACTAGTGAGGACTG <u>AGG</u>    | AG1, AG7           | 6   |
| A5       | <i>Ly49a</i>     | GTGAGACCTGAGGAGACTAA <u>AGG</u>   | AG1, AG7, A15, A20 | 6   |
| T3       | <i>Ncr1</i>      | GGTACAGCATAGAGCTCACA <u>AGG</u>   | Ly49A-KI           | 7   |
| T1       | <i>Ncr1</i>      | GTGAGCTCTATGCTGTACCCT <u>G</u> G  | Ly49A-KI           | 7   |

The names of the sgRNA guides (Guide ID) are provided along with the intended genomic targets, the sgRNA sequence including the “NGG” protospacer adjacent motif (PAM) site underlined, the mice generated with the sgRNA and the chromosomal location of the targeted gene. A complete list containing all relevant on-target and off-target sites in B6 mice is provided as supplemental file **Table\_S1.xls** and references the specific guides using the Guide ID. In this file, individual on-target and potential off-target sites are indicated as identified by CCTop (see Methods). Specifically, the input sgRNA sequence along with the number of mismatches and the location of mismatches within the 12nt core (less likely to bind) or outside the core are shown. Chromosome positions of targets along with gene names, if available are indicated. Potential off-target sites within the target chromosome are highlighted and were carefully examined with sequence (**Figure S1**) and flow cytometric methods (**Figure S2**). Related to STAR Methods.

**Table S2: List of MCMV sgRNA target sites**

A complete list of all guides with no or minimal off-target sites is provided as supplemental file

**Table\_S2.xls.** In this file, individual on-target and potential off-target sites are indicated as identified by CCTop (see Methods). Specifically, the individual sgRNA sites only within the MCMV genome was interrogated for all CRISPR/Cas9 target sites. Any alternate cleavage sites are indicated. The two sgRNA guide sequences used in our experiments are identified as T303 (*m06*) and T18561 (*m152*) (see also **Table S3**) and is highlighted in yellow within the file. Related to STAR Methods.

**Table S3: sgRNAs specific for MCMV *m06* or *m152***

| Guide ID | Target      | sgRNA Sequence + <u>PAM</u>     | Forward Oligo (5' to 3')  | Reverse Oligo (5' to 3')  |
|----------|-------------|---------------------------------|---------------------------|---------------------------|
| T303     | <i>m06</i>  | AGAGTCTTACGTTAAGACAG <u>AGG</u> | caccgAGAGTCTTACGTTAAGACAG | aaacCTGTGTTAACGTAAGACTCTc |
| T18561   | <i>m152</i> | TATGGACGTGCGCATATTCG <u>AGG</u> | caccgTATGGACGTGCGCATATTCG | aaacCGAATATGCGCACGTCCATAc |

The names of the sgRNA guides (Guide ID) are provided (see also **Table\_S2.xls**) along with the intended MCMV ORF targets, and the sgRNA sequence including the “NGG” protospacer adjacent motif (PAM) site underlined. Two oligos were used to generate duplex DNA used for cloning into the modified px330 *Cas9*-encoding vector (see **Methods**). An additional guanine residue was appended to the forward oligo (and complementary cytosine to the reverse oligo) to enhance sgRNA production from the *U6* promoter in cells. Related to STAR Methods.

**Table S4: The primers used for *Ly49* gene sequence analysis**

| Gene                   | Fwd Primer Sequence (5' to 3')   | Rev Primer Sequence (5' to 3') | Amplicon size (nt) |
|------------------------|----------------------------------|--------------------------------|--------------------|
| <i>Klra1/Ly49a</i>     | TCTTCCCTCCCATCTTTGTTCA           | TGGGTCAGTCCATGTCAGTG           | 439                |
| <i>Klra2/Ly49b</i>     | ATTGTTCTGCTCTGCGCATC             | AGAGTCAGGGTGTTGGACC            | 409                |
| <i>Klra3/Ly49c</i>     | TCTTCCCTCCCGTCCTTGTA             | TGCATGTCAGGGTGTTTGGA           | 428                |
| <i>Klra4/Ly49d</i>     | TCACCCTCATGCATAACTAAGG           | CAGTCCATGCTGCAGTGTTT           | 421                |
| <i>Klra5/Ly49e</i>     | CTTCTCCGGGCCCTTGAATC             | GGCTGTATCAATGGTAGAATGGC        | 414                |
| <i>Klra6/Ly49f</i>     | CTCCCATACTTGTGCATAATCAAA         | GGATCAGTCCATGTCAGGGTG          | 427                |
| <i>Klra7/Ly49g</i>     | AACCAAGCCCAATGAGATC              | GGTCAGTCCATGTCAGGGTG           | 411                |
| <i>Klra8/Ly49h</i>     | GGAACATTTTACTTTTCAATGAAAGCCT     | CTGTATCATCAGATCCAGGTACCTTT     | 324                |
| <i>Klra9/Ly49i</i>     | CAAGCCCCGATGAGATGGAT             | GGATCAGTCCATGTCAGGGTT          | 409                |
| <i>Klra10/Ly49j</i>    | CAAGCCCCGATGAGATGGAC             | GGATCAGTCCATGTCAGGGTA          | 409                |
| <i>Klra13-ps/Ly49m</i> | CTTTTCTTCTCTCTCACCTTATGCATAAC    | CCCAAGATGAGTGAGCAGGAGGT        | 278                |
| <i>Klra14-ps/Ly49n</i> | ACTTCTTGTTTCCAAGAAATGTTTTCTTACTG | CACCTTTCTCAACCTTCTGTATCACT     | 591                |
| <i>Klra17/Ly49q</i>    | GCCCATCTGGCTTCCTTCT              | TGAGTCCCAGTCAGGGTCAT           | 533                |
| <i>Gm15854/Ly49x</i>   | TTCTCTTACCCTCGTGCATAAC           | GTGAGGTCAGTCCATGCTGAG          | 438                |
| <i>Gm6584</i>          | AGCCAAGCCCAGATGAAATGA            | ACAGGGTTTCTCCCCTGAAA           | 428                |

This table provides the primer sequences and amplicon lengths used for amplification and sequencing the *Ly49* region of the murine NKC locus on chromosome 6. See **Methods** for sequencing conditions and **Figure S1** for results. Related to STAR Methods.

**Table S5: The primers used for MCMV *m06* and *m152* gene sequence analysis**

| ORF         | Fwd Sequence Primer (5' to 3') | Rev Sequence Primer (5' to 3') | Amplicon size (nt) |
|-------------|--------------------------------|--------------------------------|--------------------|
| <i>m06</i>  | CACGCCCAAATCACGCAAAC           | GGCGTAGTCGAATGGTACA            | 853                |
| <i>m152</i> | CGATGTCATCCTCGGATA             | GGCTACTCCCGAAAGAGTAA           | 578                |

This table provides the primer sequences and amplicon lengths used for amplification and sequencing the viral ORFs *m06* and *m152* from MCMV. See **Methods** for sequencing conditions and **Figure S5** for results. Related to STAR Methods.
